# Supplementary material for: Undecametallic and hexadecametallic ferric oxo–hydroxo/ethoxo pivalate clusters
Source: Royal Society of Chemistry journal article supplement (doi:10.1039/c5dt00665a), 2015-01-01
Supplement: c5dt00665a1.pdf [file c5dt00665a1.pdf]

## Supplementary Materials

### Undecametallic and Hexadecametallic Ferric Oxo-Hydroxo/Ethoxo Pivalate Clusters

**Svetlana G. Baca,<sup>\*,a,b</sup> Manfred Speldrich,<sup>a</sup> Jan van Leusen,<sup>a</sup> Arkady Ellern,<sup>c</sup>  
and Paul Kögerler<sup>\*,a,d</sup>**

*<sup>a</sup>Institute of Inorganic Chemistry, RWTH Aachen University, D-52074 Aachen,  
Germany*

*<sup>b</sup>Institute of Applied Physics, Academy of Sciences of Moldova, 2028 Chisinau,  
Moldova*

*<sup>c</sup>Ames Laboratory, Iowa state University, Ames, Iowa 50011, United States*

*<sup>d</sup>Peter Grünberg Institute-6, Research Centre Jülich, D-52425 Jülich, Germany*

#### **Corresponding authors:**

\*(S.G.B.) E-mail: sbaca\_md@yahoo.com; Fax: +373-22-725887; Tel: +373-22-738154

(P.K.) E-mail: paul.koegerler@ac.rwth-aachen.de; Fax: +49-241-80-92642; Tel: +49-241-80-93642

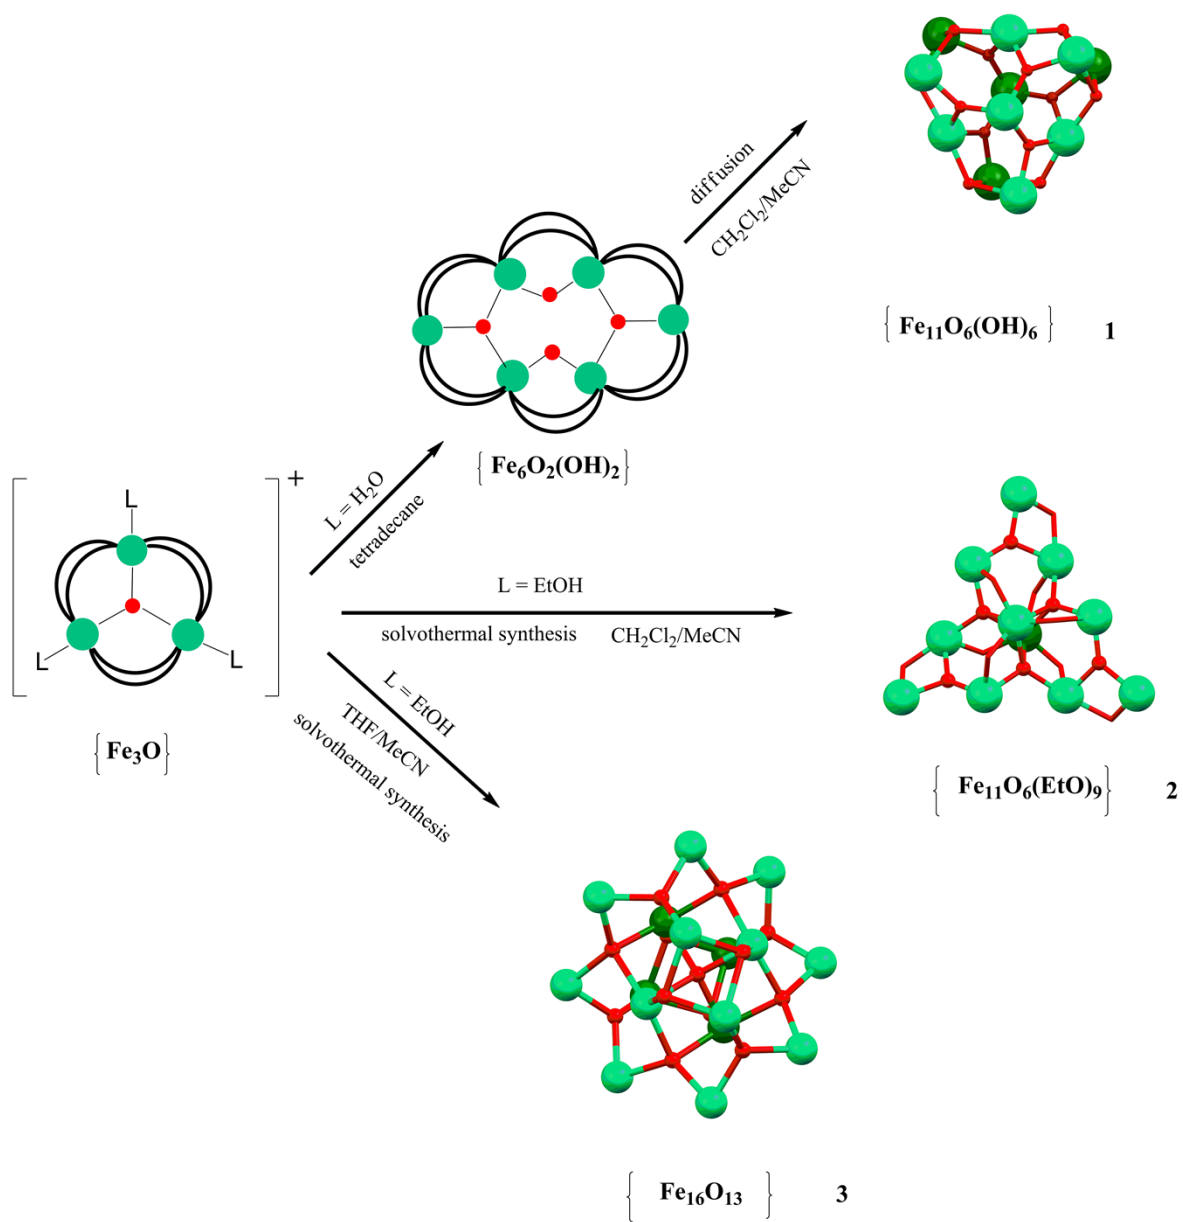

Scheme S1. Synthesis of  $Fe_{11}$  and  $Fe_{16}$  clusters.

## Experimental Section

### Syntheses

All reactions were carried out under aerobic conditions using commercial grade solvents.  $[\text{Fe}_3\text{O}(\text{O}_2\text{CCMe}_3)_6(\text{H}_2\text{O})_3]\text{O}_2\text{CCMe}_3 \cdot 2\text{Me}_3\text{CCO}_2\text{H}^{[1]}$  and  $[\text{Fe}_6\text{O}_2(\text{OH})_2(\text{O}_2\text{CCMe}_3)_{12}]^{[1-2]}$  were synthesized as described elsewhere.  $[\text{Fe}_3\text{O}(\text{O}_2\text{CCMe}_3)_6(\text{EtOH})_3]\text{NO}_3 \cdot \text{EtOH}$  was prepared by a slightly modified procedure reported in <sup>[1]</sup> as following: iron(III) nitrate nonahydrate and pivalic acid were heated until the volume of the mixture was reduced up to 1/3 and then ethanol was added. The resulting yellow precipitate was filtered off in 2 days, washed with hexane and dried in air. Its identity has been confirmed by a single-crystal X-ray diffraction analysis (the brown crystals of  $[\text{Fe}_3\text{O}(\text{O}_2\text{CCMe}_3)_6(\text{EtOH})_3]\text{NO}_3 \cdot \text{EtOH}$  (**4**) were prepared by slow evaporation of its solution in dichloromethane: monoclinic, space group  $P2_1/n$ ,  $a = 13.661(2)$ ,  $b = 17.953(3)$ ,  $c = 21.562(4)$  Å,  $\beta = 100.919(2)^\circ$ ,  $V = 5192.5(15)$  Å<sup>3</sup>,  $T = 173(2)$  K,  $Z = 4$ , 60093 reflections collected,  $R_1 = 0.0389$ ,  $wR_2 = 0.0845$  using 10746 reflections with  $I > 2\sigma(I)$ ). Elemental analysis (%) calcd. for  $\text{C}_{38}\text{H}_{78}\text{Fe}_3\text{NO}_{20}$  (FW = 1036.56): C 44.03, H 7.58, N 1.35; found: C 43.60, H 6.99, N 1.31. IR (KBr):  $\nu = 3439$  (br, m), 2962 (m), 2929 (m), 2871 (sh), 1581 (m), 1525 (vs), 1485 (s), 1424 (vs), 1379 (m), 1363 (m), 1229 (s), 1159 (w), 1097 (m), 1048 (m), 891 (m), 789 (w), 608 (m), 441 (m). ESI-MS:  $m/z$  934  $[\text{Fe}_3\text{O}(\text{Piv})_6(\text{thf})_2]^+$  (72%);  $m/z$  862  $[\text{Fe}_3\text{O}(\text{Piv})_6(\text{thf})]^+$  (100%).

**Synthesis of  $[\text{Fe}_{11}\text{O}_6(\text{OH})_6(\text{O}_2\text{CCMe}_3)_{15}]$  (**1**):**  $[\text{Fe}_6\text{O}_2(\text{OH})_2(\text{O}_2\text{CCMe}_3)_{12}]$  (0.240 g) was refluxed in  $\text{CH}_2\text{Cl}_2$  (5 mL) for 10 min and the resulting mixture was filtered. The light brown needle-shaped single crystals of **1** suitable for X-ray measurements were obtained by slow diffusion of acetonitrile (5 mL) into the filtrate at room temperature. The crystals were filtered off, washed with MeCN and dried in air. (Yield: 0.152 g; 80% based on Fe). Elemental analysis (%) calcd. for  $\text{C}_{75}\text{H}_{141}\text{Fe}_{11}\text{O}_{42}$  (FW = 2329.23): C 38.67, H 6.10; found: C 38.53, H 6.12. IR (KBr):  $\nu = 3606$  (m), 2962 (m), 2931 (m), 2873 (sh), 1583 (vs), 1563 (sh), 1524 (sh), 1485 (vs), 1459 (sh), 1422 (vs), 1379 (m), 1358 (m), 1229 (s), 1032 (w), 938 (w), 898 (w), 822 (m), 783 (m), 699 (sh), 650 (m), 608 (m), 515 (w), 442 (m).

**Synthesis of  $[\text{Fe}_{11}\text{O}_6(\text{EtO})_9(\text{O}_2\text{CCMe}_3)_{12}] \cdot 1.5\text{CH}_2\text{Cl}_2 \cdot \text{MeCN}$  ( $2 \cdot 1.5\text{CH}_2\text{Cl}_2 \cdot \text{MeCN}$ ):**  $[\text{Fe}_3\text{O}(\text{O}_2\text{CCMe}_3)_6(\text{EtOH})_3]\text{NO}_3 \cdot \text{EtOH}$  (0.208 g),  $\text{CH}_2\text{Cl}_2$  (2 mL) and MeCN (3 mL) were placed

in a sealed PTFE-lined steel autoclave and heated for 4 hours at 120°C and then allowed to slowly cool to room temperature over 48 hours. Light brown needle-shaped crystals of **2·1.5CH<sub>2</sub>Cl<sub>2</sub>·MeCN**, which are crystallized with a small amount of hexagonal dark brown crystals of **3**, were removed by filtration. Additional amount of **2** without any crystals **3** was received after standing the filtrate at r.t. for several days. The crystals were filtered off, washed with MeCN and dried in air. To remove the co-precipitated dark brown crystals of **3**, the first precipitate was dissolve in cold CH<sub>2</sub>Cl<sub>2</sub>, filtered and the resulting solution was carefully layered with MeCN. (Yield: 0.080 g; 59% based on Fe). Elemental analysis (%) calcd. for C<sub>81.5</sub>H<sub>159</sub>Cl<sub>3</sub>Fe<sub>11</sub>NO<sub>39</sub> (FW = 2497.77): C 39.19, H 6.42, N 0.56; found: C 38.47, H 6.35, N 0.00. IR (KBr):  $\nu$  = 3430 (br, w), 2963 (m), 2930 (m), 2871 (sh), 1553 (s), 1485 (vs), 1428 (vs), 1379 (m), 1363 (m), 1231 (s), 1102 (w), 1056 (w), 1033 (w), 937 (w), 899 (w), 787 (w), 726 (sh), 604 (m), 529 (m), 441 (m).

***Synthesis of [Fe<sub>16</sub>O<sub>13</sub>(EtO)<sub>6</sub>(O<sub>2</sub>CCMe<sub>3</sub>)<sub>16</sub>] (3):***

**3·0.25thf.** [Fe<sub>3</sub>O(O<sub>2</sub>CCMe<sub>3</sub>)<sub>6</sub>(EtOH)<sub>3</sub>]NO<sub>3</sub>·EtOH (0.208 g), thf (2.5 mL) and MeCN (2.5 mL) were placed in a sealed PTFE-lined steel autoclave and heated for 4 hours at 120°C and then allowed to slowly cool to room temperature over 48 hours. Dark brown crystals of **3·0.25thf** suitable for X-ray analysis were removed by filtration, washed with MeCN and dried in air. The additional amount of **3·0.25thf** were crystalized by slow evaporation of the filtrate. (Yield: 0.051 g; 45% based on Fe). Elemental analysis (%) calcd. for C<sub>93</sub>H<sub>176</sub>Fe<sub>16</sub>O<sub>51.25</sub> (FW = 3007.94): C 37.19, H 5.91; found: C 37.51, H 5.72. IR (KBr):  $\nu$  = 3425 (br, w), 2963 (m), 2930 (m), 2870 (sh), 1553 (s), 1527 (s), 1485 (vs), 1429 (vs), 1414 (sh), 1379 (m), 1360 (m), 1230 (s), 1105 (m), 1065 (m), 1040 (m), 938 (w), 882 (m), 791 (m), 725 (m), 694 (m), 642 (m), 599 (m), 579 (sh), 509 (m), 442 (m).

**3·3thf.** [Fe<sub>3</sub>O(O<sub>2</sub>CCMe<sub>3</sub>)<sub>6</sub>(EtOH)<sub>3</sub>]NO<sub>3</sub>·EtOH (0.500 g) and thf (5 mL) were placed in a sealed PTFE-lined steel autoclave and heated for 4 hours at 120°C and then allowed to slowly cool to room temperature over 48 hours. Dark brown plate-shaped single crystal of **3·3thf** was used for single crystal X-ray diffraction analysis and the remaining crystalline product was collected by filtration, washed with small amounts of hexane and dried in air. The additional amount of **3·3thf** were crystalized by slow evaporation of the filtrate. (Yield: 0.075 g; 25% based on Fe). Elemental analysis (%) calc. for C<sub>104</sub>H<sub>198</sub>Fe<sub>16</sub>O<sub>54</sub> (FW = 3206.22): C 38.96, H 6.22; found: C 37.39, H 6.42. IR (KBr):  $\nu$  = 3443 (br, w), 2962 (m), 2930 (m), 2871 (sh), 1553 (s), 1526 (s), 1485 (vs), 1429 (vs),

1415 (sh), 1379 (m), 1360 (m), 1230 (s), 1105 (w), 1066 (w), 1039 (m), 882 (m), 791 (w), 725 (m), 693 (w), 644 (w), 599 (m), 579 (sh), 509 (m), 437(m).

### **Physical measurements**

IR spectra were recorded on a Perkin-Elmer Spectrum One spectrometer using KBr pellets in the region 4000 – 400  $\text{cm}^{-1}$ . TGA/DTA measurements were carried out with a Mettler Toledo TGA/SDTA 851 in dry  $\text{N}_2$  (60  $\text{ml min}^{-1}$ ) at a heating rate of 10  $\text{K min}^{-1}$  (Figs. S4-S8). Electrospray ionization mass spectrometry was carried out with a LTQ Orbitrap XL mass spectrometer in tetrahydrofuran. Magnetic susceptibility data were recorded using a Quantum Design MPMS-5XL SQUID magnetometer as a function of field (0.1 to 5.0 Tesla) and temperature (2.0 to 290.0 K). Experimental data were corrected for sample holder (PTFE capsules) and diamagnetic contributions calculated from tabulated values.

### **X-ray crystallography**

Single-crystal X-ray diffraction experiments were carried out on a Bruker diffractometer with APEX II CCD detector using graphite monochromated MoK $\alpha$  radiation with a detector distance of 50.6 mm. Full-sphere data collection with exposures of 30 s per frame were made with  $\omega$  scans in the range 0–180° at  $\varphi = 0, 120, \text{ and } 240^\circ$ . A semi-empirical absorption correction was based on a fit of a spherical harmonic function to the empirical transmission surface as sampled by multiple equivalent measurements<sup>3</sup> using SADABS software.<sup>4</sup> The edge of a detector corresponds to a resolution of 0.71 Å, however, the datasets have been truncated to obtain the statistically relevant resolution. The positions of metal atoms were found by the direct methods. The remaining atoms were located in an alternating series of least-squares cycles and difference Fourier maps. All non-hydrogen atoms were refined in full-matrix anisotropic approximation using the SHELX suite of programs.<sup>5</sup> All hydrogen atoms were placed in the structure factor calculation at idealized positions and were allowed to ride on the neighboring atoms with relative isotropic displacement coefficients. The carboxylate ligands are highly disordered; therefore various restraints were applied to obtain reasonable geometrical parameters and thermal displacement coefficients. Crystal structures have huge voids accessible for solvents but not all of them were objectively located on a difference Fourier map and refined. The attempt to apply SQUEEZE<sup>6</sup> routine designed to treat electron density of disordered and diffused solvents did not result in any improvement;

therefore the original datasets were used for the final refinements. All calculations were performed using BRUKER APEX II software suite<sup>6</sup> and DIAMOND<sup>7</sup> software suite was used for graphical representation. The summary of the data collection and the crystallographic parameters of compounds **1–3** are listed in Table S1 and selected bond distances and angles in Table S2. CCDC - 875371 (**1**), 875369 (**2**·**1.5CH<sub>2</sub>Cl<sub>2</sub>·MeCN**), 875370 (**3**·**0.25thf**), 875373 (**3**·**3thf**) and 875372 (**4**) contain the supplementary crystallographic data for this paper. These data can be obtained free of charge via [www.ccdc.cam.ac.uk/conts/retrieving.html](http://www.ccdc.cam.ac.uk/conts/retrieving.html) (or from the Cambridge Crystallographic Data Centre, 12, Union Road, Cambridge CB21EZ, UK; fax: (+44)1223-336-033; or [deposit@ccdc.cam.ac.uk](mailto:deposit@ccdc.cam.ac.uk)).

- [1] N. V. Gerbeleu, A. S. Batsanov, G. A. Timko, Iu. T. Struchkov, K. M. Indrichan, G. A. Popovich, *Dokl. Akad. Nauk SSSR (Russ.)* **1987**, *293*, 364-367.
- [2] O. S. Manole, A.S. Batsanov, Iu.T. Struchkov, G.A. Timko, L.D. Synzheryan, N.V. Gerbeleu, *Koord. Khim. (Russ.)* **1994**, *20*, 231-237.
- [3] R. H. Blessing, *Acta Cryst.* **1995**, *A51*, 33-38.
- [4] G. M. Sheldrick, *Acta Cryst.* **2008**, *A64*, 112-122.
- [5] A. L. Spek, *J. Appl. Cryst.* **2003**, *36*, 7-13
- [6] Bruker AXS Inc., Madison, Wisconsin, USA. **2008**.
- [7] Diamond Version 3.2h 1997-2012 Crystal Impact GbR, Bonn, Germany

**Table S1.** Crystal Data and Details of Structural Determinations for **1–3**

|                                                        | <b>1</b>                                                            | <b>2·1.5CH<sub>2</sub>Cl<sub>2</sub>·<br/>MeCN</b>                                   | <b>3·0.25thf</b>                                                     | <b>3·3thf</b>                                                       |
|--------------------------------------------------------|---------------------------------------------------------------------|--------------------------------------------------------------------------------------|----------------------------------------------------------------------|---------------------------------------------------------------------|
| Empirical formula                                      | C <sub>75</sub> H <sub>141</sub> Fe <sub>11</sub> O <sub>42</sub>   | C <sub>81.5</sub> H <sub>159</sub> Cl <sub>3</sub> Fe <sub>11</sub> NO <sup>39</sup> | C <sub>93</sub> H <sub>176</sub> Fe <sub>16</sub> O <sub>51.25</sub> | C <sub>104</sub> H <sub>198</sub> Fe <sub>16</sub> O <sub>54</sub>  |
| <i>M<sub>r</sub></i> (g mol <sup>-1</sup> )            | 2329.23                                                             | 2497.80                                                                              | 3007.94                                                              | 3206.22                                                             |
| <i>T</i> (K)                                           | 173(2)                                                              | 173(2)                                                                               | 173(2)                                                               | 100(2)                                                              |
| Crystal system                                         | monoclinic                                                          | triclinic                                                                            | monoclinic                                                           | monoclinic                                                          |
| Space group                                            | <i>P</i> 2 <sub>1</sub> / <i>c</i>                                  | <i>P</i> -1                                                                          | <i>P</i> 2 <sub>1</sub> / <i>c</i>                                   | <i>C</i> 2/ <i>c</i>                                                |
| <i>a</i> (Å)                                           | 31.488(2)                                                           | 13.2026(18)                                                                          | 32.725(4)                                                            | 35.891(7)                                                           |
| <i>b</i> (Å)                                           | 26.215(2)                                                           | 16.084(2)                                                                            | 28.973(4)                                                            | 30.379(6)                                                           |
| <i>c</i> (Å)                                           | 31.169(2)                                                           | 27.889(4)                                                                            | 29.299(4)                                                            | 31.253(6)                                                           |
| $\alpha$ (°)                                           | 90                                                                  | 95.898(2)                                                                            | 90                                                                   | 90                                                                  |
| $\beta$ (°)                                            | 117.430(2)                                                          | 90.145(2)                                                                            | 90.576(1)                                                            | 124.42(3)                                                           |
| $\gamma$ (°)                                           | 90                                                                  | 96.779(2)                                                                            | 90                                                                   | 90                                                                  |
| <i>V</i> (Å <sup>3</sup> )                             | 22837(3)                                                            | 5849.1(14)                                                                           | 27778.2(6)                                                           | 28110.1(10)                                                         |
| <i>Z</i> , $\rho$ (Mg m <sup>-3</sup> )                | 8, 1.355                                                            | 2, 1.418                                                                             | 8, 1.438                                                             | 8, 1.515                                                            |
| $\mu$ (mm <sup>-1</sup> )                              | 1.426                                                               | 1.462                                                                                | 1.690                                                                | 1.677                                                               |
| <i>F</i> (000)                                         | 9704                                                                | 2608                                                                                 | 12480                                                                | 13360                                                               |
| Crystal size (mm)                                      | 0.31 x 0.13 x 0.07                                                  | 0.16 x 0.11 x 0.08                                                                   | 0.33 x 0.19 x 0.10                                                   | 0.20 x 0.19 x 0.09                                                  |
| Theta range for data collection (°)                    | 0.73–17.27                                                          | 1.41–23.26                                                                           | 1.16–23.26                                                           | 0.96–23.26                                                          |
| Index ranges                                           | –26 ≤ <i>h</i> ≤ 26,<br>–21 ≤ <i>k</i> ≤ 21,<br>–26 ≤ <i>l</i> ≤ 25 | –14 ≤ <i>h</i> ≤ 14,<br>–17 ≤ <i>k</i> ≤ 17,<br>–30 ≤ <i>l</i> ≤ 30                  | –36 ≤ <i>h</i> ≤ 36,<br>–32 ≤ <i>k</i> ≤ 32,<br>–32 ≤ <i>l</i> ≤ 32  | –39 ≤ <i>h</i> ≤ 39,<br>–33 ≤ <i>k</i> ≤ 33,<br>–34 ≤ <i>l</i> ≤ 34 |
| Reflections collected                                  | 111627<br>[ <i>R</i> <sub>int</sub> = 0.1677]                       | 40076<br>[ <i>R</i> <sub>int</sub> = 0.0686]                                         | 169522<br>[ <i>R</i> <sub>int</sub> = 0.0883]                        | 130183<br>[ <i>R</i> <sub>int</sub> = 0.1245]                       |
| Completeness to $\theta_{\max}$                        | 99.7%                                                               | 99.9%                                                                                | 99.9%                                                                | 99.8%                                                               |
| Data /restraints/<br>parameters                        | 13873/8582/2296                                                     | 16793/1169/1293                                                                      | 39883/9232/2909                                                      | 20167/2098/1621                                                     |
| Final <i>R</i> indices<br>[ <i>I</i> > 2σ( <i>I</i> )] | <i>R</i> <sub>1</sub> = 0.0932,<br><i>wR</i> <sub>2</sub> = 0.2135  | <i>R</i> <sub>1</sub> = 0.0701,<br><i>wR</i> <sub>2</sub> = 0.1752                   | <i>R</i> <sub>1</sub> = 0.0760,<br><i>wR</i> <sub>2</sub> = 0.2002   | <i>R</i> <sub>1</sub> = 0.0481,<br><i>wR</i> <sub>2</sub> = 0.0958  |
| <i>R</i> indices (all<br>data)                         | <i>R</i> <sub>1</sub> = 0.1298,<br><i>wR</i> <sub>2</sub> = 0.2403  | <i>R</i> <sub>1</sub> = 0.1237,<br><i>wR</i> <sub>2</sub> = 0.2052                   | <i>R</i> <sub>1</sub> = 0.1238,<br><i>wR</i> <sub>2</sub> = 0.2402   | <i>R</i> <sub>1</sub> = 0.0862,<br><i>wR</i> <sub>2</sub> = 0.1182  |
| Goodness-of-fit<br>on <i>F</i> <sup>2</sup>            | 1.004                                                               | 1.033                                                                                | 1.035                                                                | 1.026                                                               |
| Largest diff. peak<br>and hole (e Å <sup>-3</sup> )    | 2.013 and –1.170                                                    | 1.199 and –1.261                                                                     | 2.03 and –1.657                                                      | 0.934 and –0.671                                                    |

**Table S2.** Selected Bond Distances (Å) and Angles (°) in **1–3**

| <b>1</b> |           |          |           |
|----------|-----------|----------|-----------|
| Fe1–O4   | 1.935(11) | Fe12–O44 | 1.902(12) |
| Fe1–O2   | 1.918(11) | Fe12–O43 | 1.911(13) |
| Fe1–O3   | 2.043(11) | Fe12–O45 | 2.090(13) |
| Fe1–O1   | 2.054(11) | Fe12–O54 | 2.093(12) |
| Fe1–O15  | 2.113(13) | Fe12–O57 | 2.101(17) |
| Fe1–O13  | 2.107(12) | Fe12–O55 | 2.109(17) |
| Fe2–O2   | 1.907(11) | Fe13–O44 | 1.876(11) |
| Fe2–O19  | 1.922(13) | Fe13–O67 | 1.941(14) |
| Fe2–O14  | 1.972(12) | Fe13–O58 | 1.976(15) |
| Fe2–O17  | 2.040(13) | Fe13–O64 | 2.029(14) |
| Fe2–O5   | 2.073(11) | Fe13–O46 | 2.097(12) |
| Fe2–O1   | 2.138(11) | Fe13–O45 | 2.142(13) |
| Fe3–O6   | 1.902(11) | Fe14–O47 | 1.911(13) |
| Fe3–O21  | 1.941(13) | Fe14–O48 | 1.923(11) |
| Fe3–O23  | 1.980(13) | Fe14–O46 | 2.038(11) |
| Fe3–O18  | 2.033(12) | Fe14–O66 | 2.068(14) |
| Fe3–O1   | 2.078(11) | Fe14–O49 | 2.067(12) |
| Fe3–O5   | 2.122(12) | Fe14–O69 | 2.099(14) |
| Fe4–O6   | 1.892(11) | Fe15–O48 | 1.905(11) |
| Fe4–O7   | 1.937(11) | Fe15–O73 | 1.928(14) |
| Fe4–O8   | 2.045(11) | Fe15–O70 | 1.949(15) |
| Fe4–O5   | 2.089(11) | Fe15–O71 | 2.014(16) |
| Fe4–O25  | 2.098(12) | Fe15–O50 | 2.083(13) |
| Fe4–O24  | 2.108(13) | Fe15–O49 | 2.139(14) |
| Fe5–O9   | 1.878(11) | Fe16–O51 | 1.905(14) |
| Fe5–O31  | 1.942(13) | Fe16–O83 | 1.929(16) |
| Fe5–O33  | 2.003(13) | Fe16–O76 | 1.980(15) |
| Fe5–O28  | 2.028(13) | Fe16–O72 | 2.043(18) |
| Fe5–O8   | 2.102(11) | Fe16–O49 | 2.043(13) |
| Fe5–O10  | 2.158(11) | Fe16–O50 | 2.043(13) |
| Fe6–O7   | 1.888(11) | Fe17–O53 | 1.906(12) |
| Fe6–O26  | 1.970(12) | Fe17–O51 | 1.901(12) |
| Fe6–O29  | 1.945(13) | Fe17–O50 | 2.043(13) |
| Fe6–O27  | 2.029(12) | Fe17–O52 | 2.063(14) |
| Fe6–O10  | 2.096(10) | Fe17–O75 | 2.075(15) |
| Fe6–O8   | 2.136(11) | Fe17–O77 | 2.126(12) |
| Fe7–O9   | 1.927(11) | Fe18–O53 | 1.905(12) |
| Fe7–O11  | 1.921(11) | Fe18–O79 | 1.961(15) |
| Fe7–O12  | 2.042(12) | Fe18–O78 | 1.959(13) |
| Fe7–O10  | 2.017(11) | Fe18–O54 | 2.062(11) |
| Fe7–O34  | 2.096(12) | Fe18–O82 | 2.051(16) |



|             |           |              |           |
|-------------|-----------|--------------|-----------|
| Fe7-O35     | 2.097(13) | Fe18-O52     | 2.163(14) |
| Fe8-O11     | 1.900(11) | Fe19-O43     | 1.902(12) |
| Fe8-O39     | 1.936(12) | Fe19-O62     | 1.94(2)   |
| Fe8-O36     | 1.978(13) | Fe19-O56     | 2.00(2)   |
| Fe8-O37     | 2.016(13) | Fe19-O81     | 2.034(16) |
| Fe8-O3      | 2.097(12) | Fe19-O52     | 2.080(15) |
| Fe8-O12     | 2.119(11) | Fe19-O54     | 2.140(14) |
| Fe9-O4      | 1.878(11) | Fe20-O48     | 1.890(11) |
| Fe9-O41     | 1.945(13) | Fe20-O44     | 1.944(12) |
| Fe9-O16     | 1.969(12) | Fe20-O53     | 1.909(12) |
| Fe9-O38     | 2.015(13) | Fe20-O80     | 2.072(14) |
| Fe9-O12     | 2.088(12) | Fe20-O74     | 2.085(13) |
| Fe9-O3      | 2.128(11) | Fe20-O68     | 2.070(13) |
| Fe10-O9     | 1.929(11) | Fe21-O43     | 1.910(14) |
| Fe10-O4     | 1.919(11) | Fe21-O51     | 1.914(13) |
| Fe10-O6     | 1.929(11) | Fe21-O47     | 1.907(11) |
| Fe10-O42    | 2.073(13) | Fe21-O84     | 2.095(17) |
| Fe10-O22    | 2.106(13) | Fe21-O59     | 2.105(16) |
| Fe10-O32    | 2.112(13) | Fe21-O61     | 2.098(18) |
| Fe11-O11    | 1.911(11) | Fe22-O47     | 1.913(12) |
| Fe11-O7     | 1.927(11) | Fe22-O60     | 1.923(15) |
| Fe11-O2     | 1.918(11) | Fe22-O65     | 1.984(14) |
| Fe11-O30    | 2.081(13) | Fe22-O63     | 2.024(15) |
| Fe11-O40    | 2.101(12) | Fe22-O45     | 2.082(13) |
| Fe11-O20    | 2.106(12) | Fe22-O46     | 2.168(11) |
| O2-Fe1-O1   | 79.4(5)   | O43-Fe12-O45 | 102.9(5)  |
| O4-Fe1-O1   | 104.0(5)  | O44-Fe12-O54 | 104.3(5)  |
| O3-Fe1-O1   | 174.3(5)  | O43-Fe12-O54 | 80.0(5)   |
| O2-Fe1-O13  | 89.5(5)   | O45-Fe12-O54 | 175.3(5)  |
| O4-Fe1-O13  | 156.0(5)  | O44-Fe12-O57 | 89.1(7)   |
| O3-Fe1-O13  | 83.8(4)   | O43-Fe12-O57 | 155.2(7)  |
| O1-Fe1-O13  | 92.5(5)   | O45-Fe12-O57 | 94.9(6)   |
| O2-Fe1-O15  | 155.9(5)  | O54-Fe12-O57 | 81.3(6)   |
| O4-Fe1-O15  | 88.4(5)   | O44-Fe12-O55 | 154.3(8)  |
| O3-Fe1-O15  | 93.3(5)   | O43-Fe12-O55 | 89.3(9)   |
| O1-Fe1-O15  | 81.6(5)   | O45-Fe12-O55 | 82.4(6)   |
| O13-Fe1-O15 | 76.5(5)   | O54-Fe12-O55 | 94.1(6)   |
| O2-Fe2-O19  | 102.5(5)  | O57-Fe12-O55 | 75.9(9)   |
| O2-Fe2-O14  | 96.6(5)   | O44-Fe13-O67 | 103.9(5)  |
| O19-Fe2-O14 | 93.6(5)   | O44-Fe13-O58 | 96.7(6)   |
| O2-Fe2-O17  | 164.5(5)  | O67-Fe13-O58 | 93.3(8)   |
| O19-Fe2-O17 | 92.7(5)   | O44-Fe13-O64 | 164.2(6)  |
| O14-Fe2-O17 | 84.8(5)   | O67-Fe13-O64 | 91.5(6)   |

|             |          |              |          |
|-------------|----------|--------------|----------|
| O2-Fe2-O5   | 92.6(4)  | O58-Fe13-O64 | 85.6(6)  |
| O19-Fe2-O5  | 93.6(5)  | O44-Fe13-O46 | 92.5(5)  |
| O14-Fe2-O5  | 166.8(5) | O67-Fe13-O46 | 91.4(5)  |
| O17-Fe2-O5  | 83.8(5)  | O58-Fe13-O46 | 168.4(5) |
| O2-Fe2-O1   | 77.6(4)  | O64-Fe13-O46 | 83.6(5)  |
| O19-Fe2-O1  | 174.8(5) | O44-Fe13-O45 | 77.5(5)  |
| O14-Fe2-O1  | 91.6(5)  | O67-Fe13-O45 | 173.7(6) |
| O17-Fe2-O1  | 87.0(5)  | O58-Fe13-O45 | 92.5(7)  |
| O5-Fe2-O1   | 81.2(4)  | O64-Fe13-O45 | 86.8(6)  |
| O6-Fe3-O21  | 103.9(5) | O46-Fe13-O45 | 82.5(5)  |
| O6-Fe3-O23  | 98.0(5)  | O47-Fe14-O48 | 109.5(5) |
| O21-Fe3-O23 | 94.9(6)  | O47-Fe14-O46 | 80.1(5)  |
| O6-Fe3-O18  | 165.4(5) | O48-Fe14-O46 | 104.8(5) |
| O21-Fe3-O18 | 89.9(5)  | O47-Fe14-O49 | 103.0(5) |
| O23-Fe3-O18 | 85.1(5)  | O48-Fe14-O49 | 78.8(5)  |
| O6-Fe3-O1   | 91.6(5)  | O46-Fe14-O49 | 174.3(5) |
| O21-Fe3-O1  | 91.9(5)  | O47-Fe14-O66 | 89.6(6)  |
| O23-Fe3-O1  | 166.6(5) | O48-Fe14-O66 | 155.5(6) |
| O18-Fe3-O1  | 83.4(5)  | O46-Fe14-O66 | 93.2(5)  |
| O6-Fe3-O5   | 77.0(4)  | O49-Fe14-O66 | 82.1(5)  |
| O21-Fe3-O5  | 173.3(5) | O47-Fe14-O69 | 156.5(5) |
| O23-Fe3-O5  | 91.5(5)  | O48-Fe14-O69 | 89.7(5)  |
| O18-Fe3-O5  | 88.7(5)  | O46-Fe14-O69 | 81.9(5)  |
| O1-Fe3-O5   | 81.5(4)  | O49-Fe14-O69 | 93.8(6)  |
| O6-Fe4-O7   | 110.1(5) | O66-Fe14-O69 | 76.4(6)  |
| O6-Fe4-O8   | 104.3(4) | O48-Fe15-O73 | 101.9(6) |
| O7-Fe4-O8   | 79.3(4)  | O48-Fe15-O70 | 97.2(6)  |
| O6-Fe4-O5   | 78.1(4)  | O73-Fe15-O70 | 94.9(6)  |
| O7-Fe4-O5   | 104.0(4) | O48-Fe15-O71 | 165.8(7) |
| O8-Fe4-O5   | 175.1(5) | O73-Fe15-O71 | 91.3(7)  |
| O6-Fe4-O25  | 155.2(5) | O70-Fe15-O71 | 86.9(7)  |
| O7-Fe4-O25  | 88.8(5)  | O48-Fe15-O50 | 91.8(5)  |
| O8-Fe4-O25  | 94.7(5)  | O73-Fe15-O50 | 92.6(5)  |
| O5-Fe4-O25  | 81.9(5)  | O70-Fe15-O50 | 166.8(6) |
| O6-Fe4-O24  | 90.3(5)  | O71-Fe15-O50 | 82.1(7)  |
| O7-Fe4-O24  | 156.0(5) | O48-Fe15-O49 | 77.4(5)  |
| O8-Fe4-O24  | 83.5(5)  | O73-Fe15-O49 | 173.1(6) |
| O5-Fe4-O24  | 92.2(5)  | O70-Fe15-O49 | 91.9(6)  |
| O25-Fe4-O24 | 75.9(5)  | O71-Fe15-O49 | 88.9(6)  |
| O9-Fe5-O31  | 103.3(5) | O50-Fe15-O49 | 80.6(5)  |
| O9-Fe5-O33  | 96.9(5)  | O51-Fe16-O83 | 103.0(7) |
| O31-Fe5-O33 | 92.8(5)  | O51-Fe16-O76 | 97.1(7)  |
| O9-Fe5-O28  | 163.4(5) | O83-Fe16-O76 | 93.6(7)  |
| O31-Fe5-O28 | 92.9(5)  | O51-Fe16-O72 | 161.7(6) |

|             |          |              |          |
|-------------|----------|--------------|----------|
| O33-Fe5-O28 | 85.2(5)  | O83-Fe16-O72 | 95.0(8)  |
| O9-Fe5-O8   | 90.6(4)  | O76-Fe16-O72 | 84.9(8)  |
| O31-Fe5-O8  | 93.4(5)  | O51-Fe16-O49 | 91.0(5)  |
| O33-Fe5-O8  | 168.9(5) | O83-Fe16-O49 | 92.1(7)  |
| O28-Fe5-O8  | 85.2(5)  | O76-Fe16-O49 | 168.7(7) |
| O9-Fe5-O10  | 76.5(4)  | O72-Fe16-O49 | 84.8(7)  |
| O31-Fe5-O10 | 175.6(5) | O51-Fe16-O50 | 76.9(5)  |
| O33-Fe5-O10 | 91.6(5)  | O83-Fe16-O50 | 174.0(7) |
| O28-Fe5-O10 | 87.0(5)  | O76-Fe16-O50 | 92.3(5)  |
| O8-Fe5-O10  | 82.2(4)  | O72-Fe16-O50 | 84.8(6)  |
| O7-Fe6-O29  | 102.3(5) | O49-Fe16-O50 | 81.9(5)  |
| O7-Fe6-O26  | 96.8(5)  | O51-Fe17-O53 | 109.4(5) |
| O29-Fe6-O26 | 93.6(5)  | O51-Fe17-O50 | 79.0(5)  |
| O7-Fe6-O27  | 166.1(5) | O53-Fe17-O50 | 104.1(5) |
| O29-Fe6-O27 | 91.0(5)  | O51-Fe17-O52 | 104.7(6) |
| O26-Fe6-O27 | 86.4(5)  | O53-Fe17-O52 | 79.5(5)  |
| O7-Fe6-O10  | 91.1(4)  | O50-Fe17-O52 | 173.9(5) |
| O29-Fe6-O10 | 92.1(5)  | O51-Fe17-O75 | 90.0(5)  |
| O26-Fe6-O10 | 169.1(5) | O53-Fe17-O75 | 155.5(6) |
| O27-Fe6-O10 | 84.2(5)  | O50-Fe17-O75 | 94.0(7)  |
| O7-Fe6-O8   | 78.1(4)  | O52-Fe17-O75 | 81.2(7)  |
| O29-Fe6-O8  | 175.0(5) | O51-Fe17-O77 | 155.8(5) |
| O26-Fe6-O8  | 91.3(5)  | O53-Fe17-O77 | 90.1(5)  |
| O27-Fe6-O8  | 88.3(5)  | O50-Fe17-O77 | 82.5(5)  |
| O10-Fe6-O8  | 82.9(4)  | O52-Fe17-O77 | 92.6(5)  |
| O11-Fe7-O9  | 111.0(4) | O75-Fe17-O77 | 75.7(5)  |
| O11-Fe7-O10 | 105.3(4) | O53-Fe18-O78 | 97.8(5)  |
| O9-Fe7-O10  | 79.0(4)  | O53-Fe18-O79 | 104.0(6) |
| O11-Fe7-O12 | 78.6(4)  | O78-Fe18-O79 | 93.2(6)  |
| O9-Fe7-O12  | 104.3(5) | O53-Fe18-O82 | 163.1(7) |
| O10-Fe7-O12 | 173.8(4) | O78-Fe18-O82 | 83.6(6)  |
| O11-Fe7-O34 | 153.3(5) | O79-Fe18-O82 | 92.7(7)  |
| O9-Fe7-O34  | 89.9(5)  | O53-Fe18-O54 | 92.0(5)  |
| O10-Fe7-O34 | 94.5(5)  | O78-Fe18-O54 | 166.2(5) |
| O12-Fe7-O34 | 80.3(5)  | O79-Fe18-O54 | 93.7(6)  |
| O11-Fe7-O35 | 88.9(5)  | O82-Fe18-O54 | 84.2(6)  |
| O9-Fe7-O35  | 154.9(5) | O53-Fe18-O52 | 77.0(5)  |
| O10-Fe7-O35 | 81.1(5)  | O78-Fe18-O52 | 91.0(5)  |
| O12-Fe7-O35 | 94.3(5)  | O79-Fe18-O52 | 175.5(6) |
| O34-Fe7-O35 | 76.6(5)  | O82-Fe18-O52 | 86.1(7)  |
| O11-Fe8-O39 | 103.1(5) | O54-Fe18-O52 | 81.8(6)  |
| O11-Fe8-O36 | 97.0(5)  | O43-Fe19-O62 | 101.1(7) |
| O39-Fe8-O36 | 94.3(5)  | O43-Fe19-O56 | 96.5(7)  |
| O11-Fe8-O37 | 163.5(5) | O62-Fe19-O56 | 93.4(11) |

|              |          |              |          |
|--------------|----------|--------------|----------|
| O39-Fe8-O37  | 92.8(5)  | O43-Fe19-O81 | 165.7(7) |
| O36-Fe8-O37  | 86.2(5)  | O62-Fe19-O81 | 92.6(8)  |
| O11-Fe8-O3   | 90.6(5)  | O56-Fe19-O81 | 86.6(7)  |
| O39-Fe8-O3   | 92.3(5)  | O43-Fe19-O52 | 93.0(6)  |
| O36-Fe8-O3   | 168.5(5) | O62-Fe19-O52 | 94.3(8)  |
| O37-Fe8-O3   | 84.1(5)  | O56-Fe19-O52 | 166.4(7) |
| O11-Fe8-O12  | 77.1(4)  | O81-Fe19-O52 | 81.9(6)  |
| O39-Fe8-O12  | 173.6(5) | O43-Fe19-O54 | 79.0(5)  |
| O36-Fe8-O12  | 92.0(5)  | O62-Fe19-O54 | 176.2(8) |
| O37-Fe8-O12  | 86.6(5)  | O56-Fe19-O54 | 90.3(9)  |
| O3-Fe8-O12   | 81.3(4)  | O81-Fe19-O54 | 87.1(7)  |
| O4-Fe9-O41   | 101.8(5) | O52-Fe19-O54 | 81.9(5)  |
| O4-Fe9-O16   | 98.3(5)  | O48-Fe20-O53 | 95.3(5)  |
| O41-Fe9-O16  | 94.3(5)  | O48-Fe20-O44 | 95.5(5)  |
| O4-Fe9-O38   | 165.3(5) | O53-Fe20-O44 | 96.2(5)  |
| O41-Fe9-O38  | 92.0(5)  | O48-Fe20-O68 | 88.6(5)  |
| O16-Fe9-O38  | 85.4(5)  | O53-Fe20-O68 | 169.5(5) |
| O4-Fe9-O12   | 91.2(5)  | O44-Fe20-O68 | 93.1(5)  |
| O41-Fe9-O12  | 92.9(5)  | O48-Fe20-O80 | 170.3(5) |
| O16-Fe9-O12  | 166.6(5) | O53-Fe20-O80 | 93.3(5)  |
| O38-Fe9-O12  | 83.1(5)  | O44-Fe20-O80 | 88.0(5)  |
| O4-Fe9-O3    | 77.6(4)  | O68-Fe20-O80 | 82.2(5)  |
| O41-Fe9-O3   | 174.2(5) | O48-Fe20-O74 | 94.9(5)  |
| O16-Fe9-O3   | 91.4(5)  | O53-Fe20-O74 | 88.4(5)  |
| O38-Fe9-O3   | 88.2(5)  | O44-Fe20-O74 | 168.1(5) |
| O12-Fe9-O3   | 81.3(4)  | O68-Fe20-O74 | 81.5(5)  |
| O4-Fe10-O6   | 95.5(5)  | O80-Fe20-O74 | 80.8(5)  |
| O4-Fe10-O9   | 95.0(5)  | O47-Fe21-O43 | 96.4(5)  |
| O6-Fe10-O9   | 95.4(4)  | O47-Fe21-O51 | 94.6(5)  |
| O4-Fe10-O42  | 94.7(5)  | O43-Fe21-O51 | 96.5(5)  |
| O6-Fe10-O42  | 168.5(5) | O47-Fe21-O84 | 89.3(7)  |
| O9-Fe10-O42  | 88.8(5)  | O43-Fe21-O84 | 166.9(7) |
| O4-Fe10-O22  | 90.6(5)  | O51-Fe21-O84 | 94.8(6)  |
| O6-Fe10-O22  | 94.3(5)  | O47-Fe21-O61 | 168.8(7) |
| O9-Fe10-O22  | 168.3(5) | O43-Fe21-O61 | 93.2(8)  |
| O42-Fe10-O22 | 80.5(5)  | O51-Fe21-O61 | 90.1(7)  |
| O4-Fe10-O32  | 171.3(5) | O84-Fe21-O61 | 80.2(8)  |
| O6-Fe10-O32  | 87.8(5)  | O47-Fe21-O59 | 94.6(6)  |
| O9-Fe10-O32  | 92.7(5)  | O43-Fe21-O59 | 86.5(6)  |
| O42-Fe10-O32 | 81.3(5)  | O51-Fe21-O59 | 169.9(6) |
| O22-Fe10-O32 | 81.1(5)  | O84-Fe21-O59 | 81.2(7)  |
| O11-Fe11-O2  | 94.6(5)  | O61-Fe21-O59 | 80.2(7)  |
| O11-Fe11-O7  | 95.7(5)  | O47-Fe22-O60 | 104.1(6) |
| O2-Fe11-O7   | 95.9(5)  | O47-Fe22-O65 | 97.0(6)  |

|              |          |              |          |
|--------------|----------|--------------|----------|
| O11–Fe11–O30 | 89.9(5)  | O60–Fe22–O65 | 94.9(7)  |
| O2–Fe11–O30  | 169.7(5) | O47–Fe22–O63 | 164.1(6) |
| O7–Fe11–O30  | 92.9(5)  | O60–Fe22–O63 | 91.0(7)  |
| O11–Fe11–O40 | 93.2(5)  | O65–Fe22–O63 | 86.2(6)  |
| O2–Fe11–O40  | 89.1(5)  | O47–Fe22–O45 | 90.7(5)  |
| O7–Fe11–O40  | 169.4(5) | O60–Fe22–O45 | 92.4(6)  |
| O30–Fe11–O40 | 81.4(5)  | O65–Fe22–O45 | 167.7(6) |
| O11–Fe11–O20 | 168.8(5) | O63–Fe22–O45 | 83.8(5)  |
| O2–Fe11–O20  | 93.9(5)  | O47–Fe22–O46 | 76.8(4)  |
| O7–Fe11–O20  | 90.7(4)  | O60–Fe22–O46 | 174.5(7) |
| O30–Fe11–O20 | 80.5(5)  | O65–Fe22–O46 | 90.3(6)  |
| O40–Fe11–O20 | 79.7(4)  | O63–Fe22–O46 | 87.6(5)  |
| O44–Fe12–O43 | 111.3(5) | O45–Fe22–O46 | 82.2(5)  |
| O44–Fe12–O45 | 78.2(5)  |              |          |

**2·1.5CH<sub>2</sub>Cl<sub>2</sub>·MeCN**

|         |          |          |          |
|---------|----------|----------|----------|
| Fe1–O8  | 1.945(6) | Fe6–O30  | 2.003(7) |
| Fe1–O9  | 1.954(6) | Fe6–O9   | 2.008(6) |
| Fe1–O7  | 1.966(6) | Fe7–O6   | 1.962(6) |
| Fe1–O1  | 2.083(6) | Fe7–O1   | 1.991(5) |
| Fe1–O3  | 2.086(6) | Fe7–O12  | 2.001(6) |
| Fe1–O2  | 2.100(6) | Fe7–O15  | 2.008(6) |
| Fe2–O4  | 1.813(6) | Fe7–O19  | 2.020(6) |
| Fe2–O1  | 1.947(6) | Fe7–O33  | 2.069(6) |
| Fe2–O18 | 1.983(6) | Fe8–O11  | 1.944(6) |
| Fe2–O7  | 2.002(6) | Fe8–O12  | 1.952(6) |
| Fe2–O16 | 2.008(6) | Fe8–O10  | 1.959(6) |
| Fe3–O4  | 1.967(6) | Fe8–O1   | 2.089(6) |
| Fe3–O2  | 1.982(5) | Fe8–O2   | 2.091(5) |
| Fe3–O10 | 2.002(6) | Fe8–O3   | 2.107(6) |
| Fe3–O13 | 2.006(6) | Fe9–O4   | 1.881(6) |
| Fe3–O22 | 2.021(6) | Fe9–O13  | 1.966(6) |
| Fe3–O20 | 2.069(6) | Fe9–O21  | 2.014(6) |
| Fe4–O5  | 1.821(6) | Fe9–O17  | 2.024(6) |
| Fe4–O2  | 1.944(5) | Fe9–O35  | 2.090(7) |
| Fe4–O23 | 1.984(6) | Fe9–O34  | 2.104(7) |
| Fe4–O8  | 1.996(6) | Fe10–O5  | 1.884(6) |
| Fe4–O24 | 2.000(6) | Fe10–O14 | 1.995(6) |
| Fe5–O5  | 1.960(6) | Fe10–O27 | 1.997(7) |
| Fe5–O3  | 1.981(6) | Fe10–O25 | 2.019(7) |
| Fe5–O14 | 2.005(6) | Fe10–O37 | 2.093(6) |
| Fe5–O11 | 2.011(6) | Fe10–O36 | 2.104(7) |
| Fe5–O28 | 2.017(6) | Fe11–O6  | 1.898(6) |
| Fe5–O26 | 2.071(7) | Fe11–O15 | 1.980(6) |
| Fe6–O6  | 1.812(6) | Fe11–O31 | 1.986(7) |

|             |          |             |          |
|-------------|----------|-------------|----------|
| Fe6-O3      | 1.956(6) | Fe11-O32    | 2.014(6) |
| Fe6-O29     | 1.963(7) | Fe11-O39    | 2.093(6) |
|             |          | Fe11-O38    | 2.106(7) |
| O8-Fe1-O9   | 101.5(3) | O3-Fe6-O29  | 98.3(3)  |
| O8-Fe1-O7   | 98.8(3)  | O6-Fe6-O30  | 100.6(3) |
| O9-Fe1-O7   | 98.9(2)  | O3-Fe6-O30  | 156.1(3) |
| O8-Fe1-O1   | 156.7(2) | O6-Fe6-O9   | 101.9(3) |
| O9-Fe1-O1   | 101.8(2) | O3-Fe6-O9   | 80.6(2)  |
| O7-Fe1-O1   | 78.9(2)  | O29-Fe6-O9  | 158.2(3) |
| O8-Fe1-O3   | 103.1(2) | O30-Fe6-O9  | 88.0(3)  |
| O9-Fe1-O3   | 78.7(2)  | O6-Fe7-O1   | 96.4(2)  |
| O7-Fe1-O3   | 158.1(2) | O6-Fe7-O12  | 93.5(3)  |
| O1-Fe1-O3   | 80.3(2)  | O1-Fe7-O12  | 80.4(2)  |
| O8-Fe1-O2   | 77.8(2)  | O6-Fe7-O15  | 77.3(2)  |
| O9-Fe1-O2   | 158.3(2) | O1-Fe7-O15  | 171.8(3) |
| O7-Fe1-O2   | 102.7(2) | O12-Fe7-O15 | 104.9(3) |
| O1-Fe1-O2   | 80.2(2)  | O6-Fe7-O19  | 165.0(2) |
| O3-Fe1-O2   | 80.4(2)  | O1-Fe7-O19  | 98.4(2)  |
| O4-Fe2-O1   | 101.0(2) | O12-Fe7-O19 | 91.5(3)  |
| O4-Fe2-O18  | 98.7(3)  | O15-Fe7-O19 | 87.8(2)  |
| O1-Fe2-O18  | 99.3(2)  | O6-Fe7-O33  | 90.3(2)  |
| O4-Fe2-O7   | 99.3(2)  | O1-Fe7-O33  | 84.7(2)  |
| O1-Fe2-O7   | 81.4(2)  | O12-Fe7-O33 | 164.9(2) |
| O18-Fe2-O7  | 161.5(3) | O15-Fe7-O33 | 90.2(3)  |
| O4-Fe2-O16  | 101.6(3) | O19-Fe7-O33 | 88.5(3)  |
| O1-Fe2-O16  | 156.3(2) | O11-Fe8-O12 | 103.1(2) |
| O18-Fe2-O16 | 84.2(3)  | O11-Fe8-O10 | 102.8(2) |
| O7-Fe2-O16  | 88.0(2)  | O12-Fe8-O10 | 101.8(3) |
| O4-Fe3-O2   | 96.2(2)  | O11-Fe8-O1  | 158.6(2) |
| O4-Fe3-O10  | 94.5(2)  | O12-Fe8-O1  | 79.1(2)  |
| O2-Fe3-O10  | 80.7(2)  | O10-Fe8-O1  | 97.4(2)  |
| O4-Fe3-O13  | 76.3(2)  | O11-Fe8-O2  | 96.8(2)  |
| O2-Fe3-O13  | 171.8(2) | O12-Fe8-O2  | 159.2(2) |
| O10-Fe3-O13 | 103.0(2) | O10-Fe8-O2  | 79.1(2)  |
| O4-Fe3-O22  | 165.1(2) | O1-Fe8-O2   | 80.2(2)  |
| O2-Fe3-O22  | 98.2(2)  | O11-Fe8-O3  | 79.0(2)  |
| O10-Fe3-O22 | 91.6(2)  | O12-Fe8-O3  | 97.8(2)  |
| O13-Fe3-O22 | 89.1(3)  | O10-Fe8-O3  | 159.2(2) |
| O4-Fe3-O20  | 90.0(2)  | O1-Fe8-O3   | 79.7(2)  |
| O2-Fe3-O20  | 85.6(2)  | O2-Fe8-O3   | 80.1(2)  |
| O10-Fe3-O20 | 166.0(2) | O4-Fe9-O13  | 79.2(2)  |
| O13-Fe3-O20 | 91.0(2)  | O4-Fe9-O21  | 99.0(3)  |
| O22-Fe3-O20 | 87.3(2)  | O13-Fe9-O21 | 91.4(3)  |

|             |          |              |          |
|-------------|----------|--------------|----------|
| O5-Fe4-O2   | 101.3(2) | O4-Fe9-O17   | 94.1(3)  |
| O5-Fe4-O23  | 100.1(3) | O13-Fe9-O17  | 173.3(3) |
| O2-Fe4-O23  | 98.2(2)  | O21-Fe9-O17  | 89.5(3)  |
| O5-Fe4-O8   | 100.4(3) | O4-Fe9-O35   | 167.4(3) |
| O2-Fe4-O8   | 80.3(2)  | O13-Fe9-O35  | 98.2(3)  |
| O23-Fe4-O8  | 159.3(3) | O21-Fe9-O35  | 93.4(3)  |
| O5-Fe4-O24  | 101.0(3) | O17-Fe9-O35  | 88.4(3)  |
| O2-Fe4-O24  | 156.7(2) | O4-Fe9-O34   | 105.1(3) |
| O23-Fe4-O24 | 84.6(3)  | O13-Fe9-O34  | 95.1(3)  |
| O8-Fe4-O24  | 88.9(2)  | O21-Fe9-O34  | 155.8(3) |
| O5-Fe5-O3   | 96.1(2)  | O17-Fe9-O34  | 86.7(3)  |
| O5-Fe5-O14  | 77.1(2)  | O35-Fe9-O34  | 62.7(3)  |
| O3-Fe5-O14  | 172.7(3) | O5-Fe10-O14  | 79.1(2)  |
| O5-Fe5-O11  | 93.3(2)  | O5-Fe10-O27  | 100.0(3) |
| O3-Fe5-O11  | 80.5(2)  | O14-Fe10-O27 | 90.6(3)  |
| O14-Fe5-O11 | 102.5(3) | O5-Fe10-O25  | 94.3(3)  |
| O14-Fe5-O26 | 89.9(3)  | O14-Fe10-O25 | 173.3(3) |
| O11-Fe5-O26 | 167.6(2) | O27-Fe10-O25 | 89.5(3)  |
| O28-Fe5-O26 | 87.6(3)  | O5-Fe10-O37  | 165.6(3) |
| O5-Fe5-O28  | 165.9(3) | O14-Fe10-O37 | 96.7(3)  |
| O3-Fe5-O28  | 97.8(3)  | O27-Fe10-O37 | 93.7(3)  |
| O14-Fe5-O28 | 88.9(3)  | O25-Fe10-O37 | 90.0(3)  |
| O11-Fe5-O28 | 91.5(3)  | O5-Fe10-O36  | 103.8(3) |
| O5-Fe5-O26  | 90.6(2)  | O14-Fe10-O36 | 95.6(3)  |
| O3-Fe5-O26  | 87.3(2)  | O27-Fe10-O36 | 156.1(3) |
| O6-Fe6-O3   | 102.3(3) | O25-Fe10-O36 | 86.9(3)  |
| O6-Fe6-O29  | 99.5(3)  | O37-Fe10-O36 | 62.7(3)  |

### 3 0.25thf

|         |          |          |          |
|---------|----------|----------|----------|
| Fe1-O1  | 1.930(6) | Fe16-O49 | 1.997(7) |
| Fe1-O22 | 1.980(7) | Fe16-O11 | 2.000(6) |
| Fe1-O2  | 1.983(6) | Fe16-O37 | 2.032(7) |
| Fe1-O20 | 2.007(7) | Fe16-O17 | 2.161(7) |
| Fe1-O24 | 2.012(7) | Fe17-O52 | 1.930(7) |
| Fe1-O14 | 2.162(6) | Fe17-O75 | 1.989(8) |
| Fe2-O1  | 1.905(7) | Fe17-O53 | 2.001(6) |
| Fe2-O15 | 1.992(7) | Fe17-O71 | 2.008(7) |
| Fe2-O5  | 2.034(6) | Fe17-O73 | 2.020(7) |
| Fe2-O23 | 2.050(7) | Fe17-O65 | 2.160(7) |
| Fe2-O26 | 2.050(7) | Fe18-O52 | 1.903(7) |
| Fe2-O3  | 2.079(6) | Fe18-O66 | 1.999(8) |
| Fe3-O1  | 1.916(6) | Fe18-O76 | 2.036(8) |
| Fe3-O27 | 1.988(7) | Fe18-O56 | 2.045(7) |
| Fe3-O4  | 2.001(6) | Fe18-O77 | 2.060(8) |
| Fe3-O25 | 2.018(7) | Fe18-O55 | 2.074(7) |

|          |          |          |          |
|----------|----------|----------|----------|
| Fe3-O28  | 2.021(7) | Fe19-O52 | 1.918(7) |
| Fe3-O14  | 2.144(7) | Fe19-O78 | 1.983(7) |
| Fe4-O6   | 1.917(6) | Fe19-O54 | 1.994(6) |
| Fe4-O2   | 1.995(6) | Fe19-O79 | 2.006(7) |
| Fe4-O32  | 1.998(7) | Fe19-O74 | 2.031(7) |
| Fe4-O21  | 2.006(7) | Fe19-O65 | 2.156(7) |
| Fe4-O30  | 2.012(7) | Fe20-O62 | 1.919(7) |
| Fe4-O16  | 2.180(7) | Fe20-O81 | 1.985(8) |
| Fe5-O3   | 1.808(6) | Fe20-O53 | 1.986(7) |
| Fe5-O9   | 1.971(6) | Fe20-O83 | 1.995(7) |
| Fe5-O2   | 2.028(6) | Fe20-O72 | 2.004(7) |
| Fe5-O8   | 2.030(6) | Fe20-O68 | 2.181(8) |
| Fe5-O16  | 2.044(6) | Fe21-O57 | 1.793(7) |
| Fe6-O7   | 1.805(6) | Fe21-O63 | 1.979(6) |
| Fe6-O9   | 1.967(6) | Fe21-O53 | 2.029(7) |
| Fe6-O2   | 2.035(6) | Fe21-O54 | 2.034(6) |
| Fe6-O4   | 2.035(6) | Fe21-O65 | 2.076(7) |
| Fe6-O14  | 2.088(6) | Fe23-O80 | 2.003(7) |
| Fe7-O10  | 1.902(6) | Fe23-O87 | 2.006(7) |
| Fe7-O15  | 1.991(7) | Fe23-O67 | 2.168(7) |
| Fe7-O3   | 2.026(7) | Fe24-O56 | 1.807(7) |
| Fe7-O38  | 2.029(7) | Fe24-O63 | 1.958(6) |
| Fe7-O40  | 2.030(6) | Fe24-O54 | 2.035(7) |
| Fe7-O5   | 2.084(7) | Fe24-O59 | 2.039(6) |
| Fe8-O5   | 1.795(6) | Fe24-O67 | 2.061(7) |
| Fe8-O9   | 1.968(6) | Fe25-O60 | 1.907(7) |
| Fe8-O11  | 2.030(6) | Fe25-O66 | 1.983(7) |
| Fe8-O4   | 2.049(6) | Fe25-O91 | 2.032(8) |
| Fe8-O17  | 2.057(6) | Fe25-O55 | 2.036(7) |
| Fe9-O13  | 1.924(6) | Fe25-O89 | 2.045(8) |
| Fe9-O4   | 1.970(6) | Fe25-O56 | 2.066(7) |
| Fe9-O34  | 1.987(7) | Fe26-O62 | 1.913(7) |
| Fe9-O29  | 1.998(7) | Fe26-O69 | 1.972(7) |
| Fe9-O36  | 2.004(7) | Fe26-O64 | 2.008(7) |
| Fe9-O17  | 2.195(6) | Fe26-O82 | 2.027(7) |
| Fe10-O6  | 1.927(6) | Fe26-O93 | 2.039(7) |
| Fe10-O44 | 1.978(7) | Fe26-O57 | 2.111(7) |
| Fe10-O8  | 1.982(6) | Fe27-O58 | 1.906(7) |
| Fe10-O42 | 2.004(7) | Fe27-O69 | 1.989(7) |
| Fe10-O31 | 2.027(7) | Fe27-O57 | 2.024(7) |
| Fe10-O16 | 2.151(7) | Fe27-O86 | 2.033(7) |
| Fe11-O6  | 1.905(6) | Fe27-O95 | 2.040(7) |
| Fe11-O18 | 1.996(7) | Fe27-O64 | 2.099(7) |
| Fe11-O7  | 2.006(6) | Fe28-O62 | 1.918(7) |



|             |          |              |          |
|-------------|----------|--------------|----------|
| Fe11-O45    | 2.034(7) | Fe28-O94     | 1.986(7) |
| Fe11-O33    | 2.036(7) | Fe28-O61     | 1.993(7) |
| Fe11-O12    | 2.107(6) | Fe28-O84     | 2.012(7) |
| Fe12-O10    | 1.926(6) | Fe28-O102    | 2.016(8) |
| Fe12-O41    | 1.986(7) | Fe28-O68     | 2.155(7) |
| Fe12-O43    | 1.993(7) | Fe29-O64     | 1.800(7) |
| Fe12-O8     | 2.003(7) | Fe29-O63     | 1.977(6) |
| Fe12-O46    | 2.022(7) | Fe29-O59     | 2.025(7) |
| Fe12-O19    | 2.148(6) | Fe29-O61     | 2.038(6) |
| Fe13-O12    | 1.795(6) | Fe29-O70     | 2.067(7) |
| Fe13-O9     | 1.981(6) | Fe30-O58     | 1.927(7) |
| Fe13-O8     | 2.028(6) | Fe30-O96     | 1.978(7) |
| Fe13-O11    | 2.051(6) | Fe30-O59     | 2.000(7) |
| Fe13-O19    | 2.052(6) | Fe30-O97     | 2.010(7) |
| Fe14-O13    | 1.912(7) | Fe30-O88     | 2.035(7) |
| Fe14-O18    | 1.980(6) | Fe30-O67     | 2.147(7) |
| Fe14-O12    | 2.005(6) | Fe31-O60     | 1.924(7) |
| Fe14-O35    | 2.026(7) | Fe31-O92     | 1.984(7) |
| Fe14-O50    | 2.042(7) | Fe31-O61     | 1.985(7) |
| Fe14-O7     | 2.129(6) | Fe31-O101    | 2.012(7) |
| Fe15-O10    | 1.926(6) | Fe31-O100    | 2.021(8) |
| Fe15-O11    | 1.983(6) | Fe31-O70     | 2.169(7) |
| Fe15-O39    | 2.000(7) | Fe32-O60     | 1.921(7) |
| Fe15-O47    | 2.000(7) | Fe32-O59     | 1.986(7) |
| Fe15-O48    | 2.005(7) | Fe32-O90     | 1.995(7) |
| Fe15-O19    | 2.198(7) | Fe32-O98     | 2.003(7) |
| Fe16-O13    | 1.920(6) | Fe32-O99     | 2.015(8) |
| Fe16-O51    | 1.987(7) | Fe32-O70     | 2.182(7) |
| O1-Fe1-O22  | 96.1(3)  | O52-Fe17-O75 | 96.0(3)  |
| O1-Fe1-O2   | 89.5(3)  | O52-Fe17-O53 | 89.5(3)  |
| O22-Fe1-O2  | 96.6(3)  | O75-Fe17-O53 | 97.5(3)  |
| O1-Fe1-O20  | 171.3(3) | O52-Fe17-O71 | 171.4(3) |
| O22-Fe1-O20 | 91.7(3)  | O75-Fe17-O71 | 91.6(3)  |
| O2-Fe1-O20  | 93.5(3)  | O53-Fe17-O71 | 93.5(3)  |
| O1-Fe1-O24  | 91.9(3)  | O52-Fe17-O73 | 91.5(3)  |
| O22-Fe1-O24 | 90.8(3)  | O75-Fe17-O73 | 90.4(3)  |
| O2-Fe1-O24  | 172.3(3) | O53-Fe17-O73 | 171.9(3) |
| O20-Fe1-O24 | 84.0(3)  | O71-Fe17-O73 | 84.4(3)  |
| O1-Fe1-O14  | 76.0(3)  | O52-Fe17-O65 | 75.9(3)  |
| O22-Fe1-O14 | 171.5(3) | O75-Fe17-O65 | 171.6(3) |
| O2-Fe1-O14  | 80.6(2)  | O53-Fe17-O65 | 80.5(3)  |
| O20-Fe1-O14 | 96.4(3)  | O71-Fe17-O65 | 96.6(3)  |
| O24-Fe1-O14 | 92.3(3)  | O73-Fe17-O65 | 91.9(3)  |

|             |          |              |          |
|-------------|----------|--------------|----------|
| O1-Fe2-O15  | 176.0(3) | O52-Fe18-O66 | 176.1(3) |
| O1-Fe2-O5   | 97.5(3)  | O52-Fe18-O76 | 92.3(3)  |
| O15-Fe2-O5  | 78.9(3)  | O66-Fe18-O76 | 90.7(3)  |
| O1-Fe2-O23  | 92.6(3)  | O52-Fe18-O56 | 98.0(3)  |
| O15-Fe2-O23 | 90.7(3)  | O66-Fe18-O56 | 78.8(3)  |
| O5-Fe2-O23  | 167.1(3) | O76-Fe18-O56 | 167.8(3) |
| O1-Fe2-O26  | 91.7(3)  | O52-Fe18-O77 | 92.3(3)  |
| O15-Fe2-O26 | 90.4(3)  | O66-Fe18-O77 | 90.0(3)  |
| O5-Fe2-O26  | 95.1(3)  | O76-Fe18-O77 | 92.9(3)  |
| O23-Fe2-O26 | 92.6(3)  | O56-Fe18-O77 | 93.3(3)  |
| O1-Fe2-O3   | 96.7(3)  | O52-Fe18-O55 | 97.0(3)  |
| O15-Fe2-O3  | 81.0(3)  | O66-Fe18-O55 | 80.3(3)  |
| O5-Fe2-O3   | 80.1(3)  | O76-Fe18-O55 | 92.3(3)  |
| O23-Fe2-O3  | 90.9(3)  | O56-Fe18-O55 | 80.0(3)  |
| O26-Fe2-O3  | 170.8(3) | O77-Fe18-O55 | 169.1(3) |
| O1-Fe3-O27  | 96.4(3)  | O52-Fe19-O78 | 96.6(3)  |
| O1-Fe3-O4   | 89.0(3)  | O52-Fe19-O54 | 89.2(3)  |
| O27-Fe3-O4  | 98.0(3)  | O78-Fe19-O54 | 96.6(3)  |
| O1-Fe3-O25  | 92.3(3)  | O52-Fe19-O79 | 172.2(3) |
| O27-Fe3-O25 | 90.0(3)  | O78-Fe19-O79 | 90.6(3)  |
| O4-Fe3-O25  | 171.7(3) | O54-Fe19-O79 | 92.7(3)  |
| O1-Fe3-O28  | 172.3(3) | O52-Fe19-O74 | 91.4(3)  |
| O27-Fe3-O28 | 91.1(3)  | O78-Fe19-O74 | 90.4(3)  |
| O4-Fe3-O28  | 92.0(3)  | O54-Fe19-O74 | 172.9(3) |
| O25-Fe3-O28 | 85.6(3)  | O79-Fe19-O74 | 85.8(3)  |
| O1-Fe3-O14  | 76.7(3)  | O52-Fe19-O65 | 76.2(3)  |
| O27-Fe3-O14 | 172.9(3) | O78-Fe19-O65 | 172.3(3) |
| O4-Fe3-O14  | 81.0(2)  | O54-Fe19-O65 | 80.7(3)  |
| O25-Fe3-O14 | 91.4(3)  | O79-Fe19-O65 | 96.6(3)  |
| O28-Fe3-O14 | 95.9(3)  | O74-Fe19-O65 | 92.5(3)  |
| O6-Fe4-O2   | 88.9(3)  | O62-Fe20-O81 | 97.3(3)  |
| O6-Fe4-O32  | 96.9(3)  | O62-Fe20-O53 | 89.8(3)  |
| O2-Fe4-O32  | 98.3(3)  | O81-Fe20-O53 | 98.0(3)  |
| O6-Fe4-O21  | 170.2(3) | O62-Fe20-O83 | 93.6(3)  |
| O2-Fe4-O21  | 93.2(3)  | O81-Fe20-O83 | 91.2(3)  |
| O32-Fe4-O21 | 92.3(3)  | O53-Fe20-O83 | 169.7(3) |
| O6-Fe4-O30  | 92.9(3)  | O62-Fe20-O72 | 168.2(3) |
| O2-Fe4-O30  | 170.8(3) | O81-Fe20-O72 | 94.0(3)  |
| O32-Fe4-O30 | 90.4(3)  | O53-Fe20-O72 | 91.8(3)  |
| O21-Fe4-O30 | 83.6(3)  | O83-Fe20-O72 | 82.9(3)  |
| O6-Fe4-O16  | 75.5(3)  | O62-Fe20-O68 | 74.8(3)  |
| O2-Fe4-O16  | 79.9(2)  | O81-Fe20-O68 | 171.8(3) |
| O32-Fe4-O16 | 172.2(3) | O53-Fe20-O68 | 80.1(3)  |
| O21-Fe4-O16 | 95.4(3)  | O83-Fe20-O68 | 91.4(3)  |

|             |          |              |          |
|-------------|----------|--------------|----------|
| O30-Fe4-O16 | 91.8(3)  | O72-Fe20-O68 | 94.0(3)  |
| O3-Fe5-O9   | 100.1(3) | O57-Fe21-O63 | 99.7(3)  |
| O3-Fe5-O2   | 113.7(3) | O57-Fe21-O53 | 114.1(3) |
| O9-Fe5-O2   | 81.6(2)  | O63-Fe21-O53 | 81.7(3)  |
| O3-Fe5-O8   | 113.8(3) | O57-Fe21-O54 | 114.3(3) |
| O9-Fe5-O8   | 82.1(3)  | O63-Fe21-O54 | 81.4(3)  |
| O2-Fe5-O8   | 131.6(3) | O53-Fe21-O54 | 130.7(3) |
| O3-Fe5-O16  | 119.1(3) | O57-Fe21-O65 | 120.9(3) |
| O9-Fe5-O16  | 140.8(3) | O63-Fe21-O65 | 139.4(3) |
| O2-Fe5-O16  | 82.5(3)  | O53-Fe21-O65 | 81.9(3)  |
| O8-Fe5-O16  | 82.2(3)  | O54-Fe21-O65 | 81.8(3)  |
| O7-Fe6-O9   | 99.6(3)  | O55-Fe22-O63 | 100.1(3) |
| O7-Fe6-O2   | 114.3(3) | O55-Fe22-O53 | 113.9(3) |
| O9-Fe6-O2   | 81.6(3)  | O63-Fe22-O53 | 81.7(3)  |
| O7-Fe6-O4   | 114.7(3) | O55-Fe22-O61 | 113.6(3) |
| O9-Fe6-O4   | 81.6(2)  | O63-Fe22-O61 | 82.3(3)  |
| O2-Fe6-O4   | 130.1(3) | O53-Fe22-O61 | 131.8(3) |
| O7-Fe6-O14  | 121.4(3) | O55-Fe22-O68 | 119.1(3) |
| O9-Fe6-O14  | 139.1(3) | O63-Fe22-O68 | 140.8(3) |
| O2-Fe6-O14  | 81.3(2)  | O53-Fe22-O68 | 82.1(3)  |
| O4-Fe6-O14  | 81.6(2)  | O61-Fe22-O68 | 82.3(3)  |
| O10-Fe7-O15 | 174.6(3) | O58-Fe23-O54 | 88.8(3)  |
| O10-Fe7-O3  | 98.1(3)  | O58-Fe23-O85 | 96.9(3)  |
| O15-Fe7-O3  | 82.3(3)  | O54-Fe23-O85 | 97.9(3)  |
| O10-Fe7-O38 | 91.2(3)  | O58-Fe23-O80 | 169.7(3) |
| O15-Fe7-O38 | 88.0(3)  | O54-Fe23-O80 | 92.7(3)  |
| O3-Fe7-O38  | 169.7(3) | O85-Fe23-O80 | 93.0(3)  |
| O10-Fe7-O40 | 93.3(3)  | O58-Fe23-O87 | 92.7(3)  |
| O15-Fe7-O40 | 92.0(3)  | O54-Fe23-O87 | 171.7(3) |
| O3-Fe7-O40  | 92.5(3)  | O85-Fe23-O87 | 90.0(3)  |
| O38-Fe7-O40 | 91.3(3)  | O80-Fe23-O87 | 84.5(3)  |
| O10-Fe7-O5  | 97.0(3)  | O58-Fe23-O67 | 75.5(3)  |
| O15-Fe7-O5  | 77.8(3)  | O54-Fe23-O67 | 80.9(3)  |
| O3-Fe7-O5   | 80.1(3)  | O85-Fe23-O67 | 172.2(3) |
| O38-Fe7-O5  | 94.5(3)  | O80-Fe23-O67 | 94.7(3)  |
| O40-Fe7-O5  | 168.1(3) | O87-Fe23-O67 | 91.4(3)  |
| O5-Fe8-O9   | 100.4(3) | O56-Fe24-O63 | 100.5(3) |
| O5-Fe8-O11  | 113.4(3) | O56-Fe24-O54 | 114.0(3) |
| O9-Fe8-O11  | 82.9(3)  | O63-Fe24-O54 | 81.9(3)  |
| O5-Fe8-O4   | 113.5(3) | O56-Fe24-O59 | 113.2(3) |
| O9-Fe8-O4   | 81.3(2)  | O63-Fe24-O59 | 81.7(3)  |
| O11-Fe8-O4  | 132.4(2) | O54-Fe24-O59 | 132.0(3) |
| O5-Fe8-O17  | 119.0(3) | O56-Fe24-O67 | 119.3(3) |
| O9-Fe8-O17  | 140.5(3) | O63-Fe24-O67 | 140.2(3) |

|              |          |              |          |
|--------------|----------|--------------|----------|
| O11-Fe8-O17  | 82.5(3)  | O54-Fe24-O67 | 82.4(3)  |
| O4-Fe8-O17   | 82.0(2)  | O59-Fe24-O67 | 82.2(3)  |
| O13-Fe9-O4   | 90.3(3)  | O60-Fe25-O66 | 175.7(3) |
| O13-Fe9-O34  | 96.7(3)  | O60-Fe25-O91 | 93.2(3)  |
| O4-Fe9-O34   | 98.4(3)  | O66-Fe25-O91 | 91.0(3)  |
| O13-Fe9-O29  | 168.5(3) | O60-Fe25-O55 | 98.0(3)  |
| O4-Fe9-O29   | 92.1(3)  | O66-Fe25-O55 | 81.7(3)  |
| O34-Fe9-O29  | 94.1(3)  | O91-Fe25-O55 | 92.1(3)  |
| O13-Fe9-O36  | 92.5(3)  | O60-Fe25-O89 | 91.0(3)  |
| O4-Fe9-O36   | 170.9(3) | O66-Fe25-O89 | 88.9(3)  |
| O34-Fe9-O36  | 89.9(3)  | O91-Fe25-O89 | 93.0(3)  |
| O29-Fe9-O36  | 83.6(3)  | O55-Fe25-O89 | 169.3(3) |
| O13-Fe9-O17  | 74.9(3)  | O60-Fe25-O56 | 97.1(3)  |
| O4-Fe9-O17   | 80.4(2)  | O66-Fe25-O56 | 78.6(3)  |
| O34-Fe9-O17  | 171.5(3) | O91-Fe25-O56 | 168.0(3) |
| O29-Fe9-O17  | 94.3(3)  | O55-Fe25-O56 | 80.4(3)  |
| O36-Fe9-O17  | 91.9(3)  | O89-Fe25-O56 | 92.9(3)  |
| O6-Fe10-O44  | 97.0(3)  | O62-Fe26-O69 | 174.5(3) |
| O6-Fe10-O8   | 89.1(3)  | O62-Fe26-O64 | 98.1(3)  |
| O44-Fe10-O8  | 97.2(3)  | O69-Fe26-O64 | 81.6(3)  |
| O6-Fe10-O42  | 170.5(3) | O62-Fe26-O82 | 90.9(3)  |
| O44-Fe10-O42 | 92.1(3)  | O69-Fe26-O82 | 88.9(3)  |
| O8-Fe10-O42  | 92.3(3)  | O64-Fe26-O82 | 169.0(3) |
| O6-Fe10-O31  | 92.8(3)  | O62-Fe26-O93 | 93.6(3)  |
| O44-Fe10-O31 | 90.6(3)  | O69-Fe26-O93 | 91.9(3)  |
| O8-Fe10-O31  | 171.6(3) | O64-Fe26-O93 | 93.6(3)  |
| O42-Fe10-O31 | 84.4(3)  | O82-Fe26-O93 | 92.0(3)  |
| O6-Fe10-O16  | 76.0(3)  | O62-Fe26-O57 | 95.8(3)  |
| O44-Fe10-O16 | 172.7(3) | O69-Fe26-O57 | 78.7(3)  |
| O8-Fe10-O16  | 80.6(2)  | O64-Fe26-O57 | 80.3(3)  |
| O42-Fe10-O16 | 94.9(3)  | O82-Fe26-O57 | 92.6(3)  |
| O31-Fe10-O16 | 91.9(3)  | O93-Fe26-O57 | 169.4(3) |
| O6-Fe11-O18  | 174.8(3) | O58-Fe27-O69 | 175.0(3) |
| O6-Fe11-O7   | 97.4(3)  | O58-Fe27-O57 | 96.8(3)  |
| O18-Fe11-O7  | 81.5(3)  | O69-Fe27-O57 | 80.4(3)  |
| O6-Fe11-O45  | 91.2(3)  | O58-Fe27-O86 | 92.6(3)  |
| O18-Fe11-O45 | 89.4(3)  | O69-Fe27-O86 | 91.8(3)  |
| O7-Fe11-O45  | 169.3(3) | O57-Fe27-O86 | 94.6(3)  |
| O6-Fe11-O33  | 93.3(3)  | O58-Fe27-O95 | 91.7(3)  |
| O18-Fe11-O33 | 91.8(3)  | O69-Fe27-O95 | 90.7(3)  |
| O7-Fe11-O33  | 93.3(3)  | O57-Fe27-O95 | 169.2(3) |
| O45-Fe11-O33 | 92.5(3)  | O86-Fe27-O95 | 91.7(3)  |
| O6-Fe11-O12  | 96.4(3)  | O58-Fe27-O64 | 96.5(3)  |
| O18-Fe11-O12 | 78.4(3)  | O69-Fe27-O64 | 78.9(3)  |

|              |          |               |          |
|--------------|----------|---------------|----------|
| O7-Fe11-O12  | 80.6(3)  | O57-Fe27-O64  | 80.2(3)  |
| O45-Fe11-O12 | 92.2(3)  | O86-Fe27-O64  | 170.0(3) |
| O33-Fe11-O12 | 169.1(3) | O95-Fe27-O64  | 92.2(3)  |
| O10-Fe12-O41 | 96.4(3)  | O62-Fe28-O94  | 97.5(3)  |
| O10-Fe12-O43 | 172.3(3) | O62-Fe28-O61  | 88.2(3)  |
| O41-Fe12-O43 | 91.0(3)  | O94-Fe28-O61  | 97.4(3)  |
| O10-Fe12-O8  | 88.5(3)  | O62-Fe28-O84  | 93.5(3)  |
| O41-Fe12-O8  | 95.6(3)  | O94-Fe28-O84  | 91.2(3)  |
| O43-Fe12-O8  | 92.9(3)  | O61-Fe28-O84  | 171.0(3) |
| O10-Fe12-O46 | 92.1(3)  | O62-Fe28-O102 | 171.2(3) |
| O41-Fe12-O46 | 91.1(3)  | O94-Fe28-O102 | 91.1(3)  |
| O43-Fe12-O46 | 85.6(3)  | O61-Fe28-O102 | 92.8(3)  |
| O8-Fe12-O46  | 173.2(3) | O84-Fe28-O102 | 84.2(3)  |
| O10-Fe12-O19 | 75.8(3)  | O62-Fe28-O68  | 75.4(3)  |
| O41-Fe12-O19 | 171.6(3) | O94-Fe28-O68  | 172.7(3) |
| O43-Fe12-O19 | 96.9(3)  | O61-Fe28-O68  | 81.0(3)  |
| O8-Fe12-O19  | 81.3(2)  | O84-Fe28-O68  | 90.9(3)  |
| O46-Fe12-O19 | 92.3(3)  | O102-Fe28-O68 | 96.1(3)  |
| O12-Fe13-O9  | 100.2(3) | O64-Fe29-O63  | 100.2(3) |
| O12-Fe13-O8  | 112.5(3) | O64-Fe29-O59  | 114.3(3) |
| O9-Fe13-O8   | 81.9(2)  | O63-Fe29-O59  | 81.6(3)  |
| O12-Fe13-O11 | 114.3(3) | O64-Fe29-O61  | 113.3(3) |
| O9-Fe13-O11  | 82.0(2)  | O63-Fe29-O61  | 82.4(3)  |
| O8-Fe13-O11  | 132.4(3) | O59-Fe29-O61  | 131.8(3) |
| O12-Fe13-O19 | 117.7(3) | O64-Fe29-O70  | 118.3(3) |
| O9-Fe13-O19  | 142.1(3) | O63-Fe29-O70  | 141.5(3) |
| O8-Fe13-O19  | 83.1(3)  | O59-Fe29-O70  | 82.7(3)  |
| O11-Fe13-O19 | 82.8(3)  | O61-Fe29-O70  | 82.3(3)  |
| O13-Fe14-O18 | 173.4(3) | O58-Fe30-O96  | 97.0(3)  |
| O13-Fe14-O12 | 98.2(3)  | O58-Fe30-O59  | 89.3(3)  |
| O18-Fe14-O12 | 81.3(3)  | O96-Fe30-O59  | 96.3(3)  |
| O13-Fe14-O35 | 90.5(3)  | O58-Fe30-O97  | 171.2(3) |
| O18-Fe14-O35 | 89.3(3)  | O96-Fe30-O97  | 91.4(3)  |
| O12-Fe14-O35 | 169.0(3) | O59-Fe30-O97  | 92.2(3)  |
| O13-Fe14-O50 | 94.8(3)  | O58-Fe30-O88  | 92.1(3)  |
| O18-Fe14-O50 | 91.8(3)  | O96-Fe30-O88  | 90.4(3)  |
| O12-Fe14-O50 | 93.3(3)  | O59-Fe30-O88  | 172.9(3) |
| O35-Fe14-O50 | 92.7(3)  | O97-Fe30-O88  | 85.3(3)  |
| O13-Fe14-O7  | 94.6(3)  | O58-Fe30-O67  | 75.8(3)  |
| O18-Fe14-O7  | 78.8(3)  | O96-Fe30-O67  | 172.3(3) |
| O12-Fe14-O7  | 80.1(2)  | O59-Fe30-O67  | 81.0(3)  |
| O35-Fe14-O7  | 92.5(3)  | O97-Fe30-O67  | 96.0(3)  |
| O50-Fe14-O7  | 169.2(3) | O88-Fe30-O67  | 92.6(3)  |
| O10-Fe15-O11 | 88.7(3)  | O60-Fe31-O92  | 97.0(3)  |

|              |          |                |          |
|--------------|----------|----------------|----------|
| O10–Fe15–O39 | 97.5(3)  | O60–Fe31–O61   | 88.7(3)  |
| O11–Fe15–O39 | 97.0(3)  | O92–Fe31–O61   | 96.1(3)  |
| O10–Fe15–O47 | 92.6(3)  | O60–Fe31–O101  | 172.4(3) |
| O11–Fe15–O47 | 171.0(3) | O92–Fe31–O101  | 90.3(3)  |
| O39–Fe15–O47 | 91.6(3)  | O61–Fe31–O101  | 92.4(3)  |
| O10–Fe15–O48 | 171.8(3) | O60–Fe31–O100  | 92.0(3)  |
| O11–Fe15–O48 | 92.2(3)  | O92–Fe31–O100  | 91.0(3)  |
| O39–Fe15–O48 | 90.5(3)  | O61–Fe31–O100  | 172.7(3) |
| O47–Fe15–O48 | 85.2(3)  | O101–Fe31–O100 | 86.0(3)  |
| O10–Fe15–O19 | 74.7(3)  | O60–Fe31–O70   | 75.9(3)  |
| O11–Fe15–O19 | 80.8(2)  | O92–Fe31–O70   | 172.3(3) |
| O39–Fe15–O19 | 171.9(3) | O61–Fe31–O70   | 81.0(3)  |
| O47–Fe15–O19 | 91.0(3)  | O101–Fe31–O70  | 96.9(3)  |
| O48–Fe15–O19 | 97.4(3)  | O100–Fe31–O70  | 92.2(3)  |
| O13–Fe16–O51 | 98.3(3)  | O60–Fe32–O59   | 88.8(3)  |
| O13–Fe16–O49 | 170.9(3) | O60–Fe32–O90   | 97.8(3)  |
| O51–Fe16–O49 | 90.7(3)  | O59–Fe32–O90   | 97.3(3)  |
| O13–Fe16–O11 | 87.6(3)  | O60–Fe32–O98   | 170.2(3) |
| O51–Fe16–O11 | 95.3(3)  | O59–Fe32–O98   | 92.8(3)  |
| O49–Fe16–O11 | 92.8(3)  | O90–Fe32–O98   | 91.6(3)  |
| O13–Fe16–O37 | 92.0(3)  | O60–Fe32–O99   | 92.0(3)  |
| O51–Fe16–O37 | 91.5(3)  | O59–Fe32–O99   | 171.6(3) |
| O49–Fe16–O37 | 86.5(3)  | O90–Fe32–O99   | 90.9(3)  |
| O11–Fe16–O37 | 173.2(3) | O98–Fe32–O99   | 85.0(3)  |
| O13–Fe16–O17 | 75.8(3)  | O60–Fe32–O70   | 75.6(3)  |
| O51–Fe16–O17 | 172.9(3) | O59–Fe32–O70   | 80.7(3)  |
| O49–Fe16–O17 | 95.3(3)  | O90–Fe32–O70   | 173.1(3) |
| O11–Fe16–O17 | 80.6(2)  | O98–Fe32–O70   | 95.1(3)  |
| O37–Fe16–O17 | 92.7(3)  | O99–Fe32–O70   | 91.4(3)  |

### 3 3thf

|         |          |          |          |
|---------|----------|----------|----------|
| Fe1–O3  | 1.897(4) | Fe9–O9   | 1.913(4) |
| Fe1–O14 | 1.982(4) | Fe9–O40  | 1.987(4) |
| Fe1–O2  | 2.015(4) | Fe9–O5   | 1.989(3) |
| Fe1–O22 | 2.044(4) | Fe9–O31  | 2.002(4) |
| Fe1–O20 | 2.051(4) | Fe9–O49  | 2.022(4) |
| Fe1–O1  | 2.086(4) | Fe9–O15  | 2.142(4) |
| Fe2–O4  | 1.901(4) | Fe10–O12 | 1.796(4) |
| Fe2–O14 | 1.987(4) | Fe10–O13 | 1.968(3) |
| Fe2–O1  | 2.029(4) | Fe10–O6  | 2.028(4) |
| Fe2–O26 | 2.035(4) | Fe10–O5  | 2.035(3) |
| Fe2–O24 | 2.040(4) | Fe10–O17 | 2.054(4) |
| Fe2–O2  | 2.075(4) | Fe11–O10 | 1.928(4) |
| Fe3–O3  | 1.919(4) | Fe11–O6  | 1.987(4) |
| Fe3–O5  | 1.982(4) | Fe11–O42 | 1.972(4) |

|             |            |             |            |
|-------------|------------|-------------|------------|
| Fe3-O21     | 1.995(4)   | Fe11-O33    | 2.012(4)   |
| Fe3-O30     | 2.012(4)   | Fe11-O44    | 2.019(4)   |
| Fe3-O28     | 2.013(4)   | Fe11-O16    | 2.151(4)   |
| Fe3-O17     | 2.164(4)   | Fe12-O9     | 1.919(4)   |
| Fe4-O3      | 1.919(4)   | Fe12-O7     | 1.982(3)   |
| Fe4-O23     | 1.982(4)   | Fe12-O50    | 1.992(4)   |
| Fe4-O6      | 1.990(4)   | Fe12-O37    | 1.997(4)   |
| Fe4-O32     | 1.996(4)   | Fe12-O48    | 2.007(4)   |
| Fe4-O29     | 2.016(4)   | Fe12-O15    | 2.180(4)   |
| Fe4-O17     | 2.149(4)   | Fe13-O11    | 1.802(4)   |
| Fe5-O1      | 1.798(4)   | Fe13-O13    | 1.976(4)   |
| Fe5-O13     | 1.971(3)   | Fe13-O7     | 2.021(3)   |
| Fe5-O5      | 2.028(4)   | Fe13-O8     | 2.028(4)   |
| Fe5-O7      | 2.039(4)   | Fe13-O18    | 2.067(3)   |
| Fe5-O15     | 2.058(4)   | Fe14-O10    | 1.916(4)   |
| Fe6-O2      | 1.803(4)   | Fe14-O8     | 1.990(4)   |
| Fe6-O13     | 1.962(3)   | Fe14-O46    | 1.995(4)   |
| Fe6-O6      | 2.029(4)   | Fe14-O39    | 2.006(4)   |
| Fe6-O8      | 2.032(4)   | Fe14-O45    | 2.009(4)   |
| Fe6-O16     | 2.053(4)   | Fe14-O16    | 2.168(4)   |
| Fe7-O4      | 1.911(4)   | Fe15-O9     | 1.904(4)   |
| Fe7-O25     | 1.983(4)   | Fe15-O19    | 1.993(4)   |
| Fe7-O7      | 1.991(4)   | Fe15-O41    | 2.023(4)   |
| Fe7-O36     | 1.996(4)   | Fe15-O51    | 2.027(4)   |
| Fe7-O34     | 2.029(4)   | Fe15-O12    | 2.035(4)   |
| Fe7-O18     | 2.136(4)   | Fe15-O11    | 2.070(4)   |
| Fe8-O4      | 1.927(4)   | Fe16-O10    | 1.903(4)   |
| Fe8-O27     | 1.982(4)   | Fe16-O19    | 1.987(4)   |
| Fe8-O8      | 1.987(4)   | Fe16-O11    | 2.029(3)   |
| Fe8-O35     | 2.009(4)   | Fe16-O43    | 2.032(4)   |
| Fe8-O38     | 2.011(4)   | Fe16-O47    | 2.042(4)   |
| Fe8-O18     | 2.167(4)   | Fe16-O12    | 2.075(4)   |
| O3-Fe1-O14  | 176.69(16) | O9-Fe9-O40  | 97.33(16)  |
| O3-Fe1-O2   | 98.96(15)  | O9-Fe9-O5   | 88.25(15)  |
| O14-Fe1-O2  | 79.33(15)  | O40-Fe9-O5  | 96.33(15)  |
| O3-Fe1-O22  | 92.27(15)  | O9-Fe9-O31  | 170.54(16) |
| O14-Fe1-O22 | 90.69(15)  | O40-Fe9-O31 | 91.86(16)  |
| O2-Fe1-O22  | 94.41(15)  | O5-Fe9-O31  | 92.99(15)  |
| O3-Fe1-O20  | 91.25(16)  | O9-Fe9-O49  | 92.33(16)  |
| O14-Fe1-O20 | 90.14(16)  | O40-Fe9-O49 | 89.79(16)  |
| O2-Fe1-O20  | 167.87(15) | O5-Fe9-O49  | 173.72(15) |
| O22-Fe1-O20 | 91.70(16)  | O31-Fe9-O49 | 85.43(16)  |
| O3-Fe1-O1   | 96.43(15)  | O9-Fe9-O15  | 75.82(14)  |

|             |            |              |            |
|-------------|------------|--------------|------------|
| O14-Fe1-O1  | 80.51(15)  | O40-Fe9-O15  | 172.74(15) |
| O2-Fe1-O1   | 80.21(14)  | O5-Fe9-O15   | 81.23(14)  |
| O22-Fe1-O1  | 170.37(15) | O31-Fe9-O15  | 95.09(15)  |
| O20-Fe1-O1  | 92.21(15)  | O49-Fe9-O15  | 92.85(15)  |
| O4-Fe2-O14  | 173.84(16) | O12-Fe10-O13 | 100.36(15) |
| O4-Fe2-O1   | 97.52(15)  | O12-Fe10-O6  | 113.62(15) |
| O14-Fe2-O1  | 81.79(15)  | O13-Fe10-O6  | 81.77(14)  |
| O4-Fe2-O26  | 91.30(16)  | O12-Fe10-O5  | 114.49(15) |
| O14-Fe2-O26 | 88.83(16)  | O13-Fe10-O5  | 81.69(14)  |
| O1-Fe2-O26  | 169.55(16) | O6-Fe10-O5   | 131.10(14) |
| O4-Fe2-O24  | 93.82(15)  | O12-Fe10-O17 | 119.01(15) |
| O14-Fe2-O24 | 92.33(16)  | O13-Fe10-O17 | 140.62(15) |
| O1-Fe2-O24  | 92.36(15)  | O6-Fe10-O17  | 82.69(14)  |
| O26-Fe2-O24 | 92.64(16)  | O5-Fe10-O17  | 81.79(14)  |
| O4-Fe2-O2   | 96.05(15)  | O10-Fe11-O42 | 95.76(16)  |
| O14-Fe2-O2  | 77.79(15)  | O10-Fe11-O6  | 89.67(15)  |
| O1-Fe2-O2   | 80.17(14)  | O42-Fe11-O6  | 97.46(15)  |
| O26-Fe2-O2  | 93.38(15)  | O10-Fe11-O33 | 172.41(16) |
| O24-Fe2-O2  | 168.31(16) | O42-Fe11-O33 | 91.12(16)  |
| O3-Fe3-O5   | 89.54(15)  | O6-Fe11-O33  | 92.64(16)  |
| O3-Fe3-O21  | 96.63(16)  | O10-Fe11-O44 | 92.40(16)  |
| O5-Fe3-O21  | 98.48(15)  | O42-Fe11-O44 | 90.77(16)  |
| O3-Fe3-O30  | 171.80(16) | O6-Fe11-O44  | 171.27(16) |
| O5-Fe3-O30  | 92.65(15)  | O33-Fe11-O44 | 84.27(16)  |
| O21-Fe3-O30 | 90.87(16)  | O10-Fe11-O16 | 76.24(14)  |
| O3-Fe3-O28  | 92.06(15)  | O42-Fe11-O16 | 171.77(15) |
| O5-Fe3-O28  | 171.55(16) | O6-Fe11-O16  | 80.77(14)  |
| O21-Fe3-O28 | 89.58(16)  | O33-Fe11-O16 | 96.99(15)  |
| O30-Fe3-O28 | 84.65(16)  | O44-Fe11-O16 | 91.49(15)  |
| O3-Fe3-O17  | 75.76(15)  | O9-Fe12-O7   | 88.29(15)  |
| O5-Fe3-O17  | 80.33(14)  | O9-Fe12-O50  | 97.80(16)  |
| O21-Fe3-O17 | 172.27(15) | O7-Fe12-O50  | 97.25(15)  |
| O30-Fe3-O17 | 96.81(15)  | O9-Fe12-O37  | 169.18(16) |
| O28-Fe3-O17 | 92.02(15)  | O7-Fe12-O37  | 92.12(15)  |
| O3-Fe4-O23  | 97.28(16)  | O50-Fe12-O37 | 92.87(16)  |
| O3-Fe4-O6   | 88.99(15)  | O9-Fe12-O48  | 92.85(15)  |
| O23-Fe4-O6  | 96.98(16)  | O7-Fe12-O48  | 171.67(16) |
| O3-Fe4-O32  | 170.87(16) | O50-Fe12-O48 | 90.78(16)  |
| O23-Fe4-O32 | 91.54(16)  | O37-Fe12-O48 | 85.22(15)  |
| O6-Fe4-O32  | 92.30(15)  | O9-Fe12-O15  | 74.78(14)  |
| O3-Fe4-O29  | 91.56(16)  | O7-Fe12-O15  | 80.77(14)  |
| O23-Fe4-O29 | 89.51(16)  | O50-Fe12-O15 | 172.33(15) |
| O6-Fe4-O29  | 173.37(16) | O37-Fe12-O15 | 94.61(15)  |
| O32-Fe4-O29 | 86.13(16)  | O48-Fe12-O15 | 91.56(15)  |



|             |            |              |            |
|-------------|------------|--------------|------------|
| O3-Fe4-O17  | 76.11(15)  | O11-Fe13-O13 | 100.16(15) |
| O23-Fe4-O17 | 173.12(15) | O11-Fe13-O7  | 113.65(15) |
| O6-Fe4-O17  | 81.20(14)  | O13-Fe13-O7  | 81.78(14)  |
| O32-Fe4-O17 | 95.15(15)  | O11-Fe13-O8  | 113.87(15) |
| O29-Fe4-O17 | 92.52(15)  | O13-Fe13-O8  | 81.63(14)  |
| O1-Fe5-O13  | 99.84(15)  | O7-Fe13-O8   | 131.62(14) |
| O1-Fe5-O5   | 112.73(16) | O11-Fe13-O18 | 120.01(15) |
| O13-Fe5-O5  | 81.79(14)  | O13-Fe13-O18 | 139.83(14) |
| O1-Fe5-O7   | 114.76(16) | O7-Fe13-O18  | 82.05(14)  |
| O13-Fe5-O7  | 81.45(14)  | O8-Fe13-O18  | 82.19(14)  |
| O5-Fe5-O7   | 131.57(15) | O10-Fe14-O8  | 89.22(15)  |
| O1-Fe5-O15  | 119.71(15) | O10-Fe14-O46 | 96.92(16)  |
| O13-Fe5-O15 | 140.45(15) | O8-Fe14-O46  | 97.25(15)  |
| O5-Fe5-O15  | 82.37(14)  | O10-Fe14-O39 | 169.87(16) |
| O7-Fe5-O15  | 82.48(14)  | O8-Fe14-O39  | 92.02(15)  |
| O2-Fe6-O13  | 100.20(15) | O46-Fe14-O39 | 92.90(16)  |
| O2-Fe6-O6   | 113.71(16) | O10-Fe14-O45 | 92.71(15)  |
| O13-Fe6-O6  | 81.85(14)  | O8-Fe14-O45  | 171.25(16) |
| O2-Fe6-O8   | 114.00(16) | O46-Fe14-O45 | 90.99(16)  |
| O13-Fe6-O8  | 81.87(14)  | O39-Fe14-O45 | 84.61(15)  |
| O6-Fe6-O8   | 131.51(15) | O10-Fe14-O16 | 76.07(14)  |
| O2-Fe6-O16  | 119.02(15) | O8-Fe14-O16  | 80.48(14)  |
| O13-Fe6-O16 | 140.78(15) | O46-Fe14-O16 | 172.60(15) |
| O6-Fe6-O16  | 82.22(14)  | O39-Fe14-O16 | 94.21(15)  |
| O8-Fe6-O16  | 82.37(14)  | O45-Fe14-O16 | 91.70(15)  |
| O4-Fe7-O25  | 97.05(16)  | O9-Fe15-O19  | 174.15(16) |
| O4-Fe7-O7   | 88.48(15)  | O9-Fe15-O41  | 93.49(16)  |
| O25-Fe7-O7  | 96.22(15)  | O19-Fe15-O41 | 92.35(15)  |
| O4-Fe7-O36  | 171.83(16) | O9-Fe15-O51  | 90.73(16)  |
| O25-Fe7-O36 | 91.03(16)  | O19-Fe15-O51 | 89.51(15)  |
| O7-Fe7-O36  | 91.84(15)  | O41-Fe15-O51 | 91.17(16)  |
| O4-Fe7-O34  | 92.59(15)  | O9-Fe15-O12  | 97.16(15)  |
| O25-Fe7-O34 | 90.11(16)  | O19-Fe15-O12 | 82.23(15)  |
| O7-Fe7-O34  | 173.41(16) | O41-Fe15-O12 | 92.37(15)  |
| O36-Fe7-O34 | 86.18(15)  | O51-Fe15-O12 | 171.14(16) |
| O4-Fe7-O18  | 76.40(14)  | O9-Fe15-O11  | 96.35(15)  |
| O25-Fe7-O18 | 172.89(15) | O19-Fe15-O11 | 77.81(14)  |
| O7-Fe7-O18  | 81.00(14)  | O41-Fe15-O11 | 168.49(15) |
| O36-Fe7-O18 | 95.59(15)  | O51-Fe15-O11 | 94.67(15)  |
| O34-Fe7-O18 | 92.92(14)  | O12-Fe15-O11 | 80.50(14)  |
| O4-Fe8-O27  | 96.67(16)  | O10-Fe16-O19 | 176.57(15) |
| O4-Fe8-O8   | 88.78(15)  | O10-Fe16-O11 | 98.00(15)  |
| O27-Fe8-O8  | 97.51(16)  | O19-Fe16-O11 | 78.92(15)  |
| O4-Fe8-O35  | 92.49(15)  | O10-Fe16-O43 | 92.05(15)  |

|             |            |              |            |
|-------------|------------|--------------|------------|
| O27–Fe8–O35 | 90.31(16)  | O19–Fe16–O43 | 90.84(15)  |
| O8–Fe8–O35  | 171.88(16) | O11–Fe16–O43 | 167.84(15) |
| O4–Fe8–O38  | 171.31(16) | O10–Fe16–O47 | 91.75(16)  |
| O27–Fe8–O38 | 91.66(16)  | O19–Fe16–O47 | 89.98(15)  |
| O8–Fe8–O38  | 92.58(15)  | O11–Fe16–O47 | 93.83(15)  |
| O35–Fe8–O38 | 84.97(16)  | O43–Fe16–O47 | 92.69(15)  |
| O4–Fe8–O18  | 75.33(14)  | O10–Fe16–O12 | 96.67(15)  |
| O27–Fe8–O18 | 171.77(15) | O19–Fe16–O12 | 81.38(15)  |
| O8–Fe8–O18  | 80.64(14)  | O11–Fe16–O12 | 80.53(14)  |
| O35–Fe8–O18 | 91.92(14)  | O43–Fe16–O12 | 91.56(15)  |
| O38–Fe8–O18 | 96.42(15)  | O47–Fe16–O12 | 170.43(15) |

**Table S3.** BVS values

| [Fe <sub>11</sub> O <sub>6</sub> (OH) <sub>6</sub> (O <sub>2</sub> CCMe <sub>3</sub> ) <sub>15</sub> ] (1)   |       |      |        | [Fe <sub>11</sub> O <sub>6</sub> (EtO) <sub>9</sub> (O <sub>2</sub> CCMe <sub>3</sub> ) <sub>12</sub> ]<br>(2·1.5CH <sub>2</sub> Cl <sub>2</sub> ·MeCN) |       |
|--------------------------------------------------------------------------------------------------------------|-------|------|--------|---------------------------------------------------------------------------------------------------------------------------------------------------------|-------|
| Fe1                                                                                                          | 3.024 | Fe12 | 2.887  | Fe1                                                                                                                                                     | 2.994 |
| Fe2                                                                                                          | 3.150 | Fe13 | 3.101  | Fe2                                                                                                                                                     | 3.042 |
| Fe3                                                                                                          | 3.203 | Fe14 | 3.041  | Fe3                                                                                                                                                     | 3.075 |
| Fe4                                                                                                          | 2.936 | Fe15 | 3.224  | Fe4                                                                                                                                                     | 3.044 |
| Fe5                                                                                                          | 3.056 | Fe16 | 3.137  | Fe5                                                                                                                                                     | 3.082 |
| Fe6                                                                                                          | 3.162 | Fe17 | 2.960  | Fe6                                                                                                                                                     | 3.057 |
| Fe7                                                                                                          | 2.973 | Fe18 | 2.958  | Fe7                                                                                                                                                     | 3.071 |
| Fe8                                                                                                          | 3.082 | Fe19 | 3.071  | Fe8                                                                                                                                                     | 2.992 |
| Fe9                                                                                                          | 3.098 | Fe20 | 3.219  | Fe9                                                                                                                                                     | 3.221 |
| Fe10                                                                                                         | 3.081 | Fe21 | 3.239  | Fe10                                                                                                                                                    | 3.193 |
| Fe11                                                                                                         | 3.190 | Fe22 | 3.108  | Fe11                                                                                                                                                    | 3.222 |
| [Fe <sub>16</sub> O <sub>13</sub> (EtO) <sub>6</sub> (O <sub>2</sub> CCMe <sub>3</sub> ) <sub>16</sub> ] (3) |       |      |        |                                                                                                                                                         |       |
| 3·0.25thf                                                                                                    |       |      | 3·3thf |                                                                                                                                                         |       |
| Fe1                                                                                                          | 3.077 | Fe17 | 3.024  | Fe1                                                                                                                                                     | 3.075 |
| Fe2                                                                                                          | 3.014 | Fe18 | 3.004  | Fe2                                                                                                                                                     | 3.082 |
| Fe3                                                                                                          | 3.057 | Fe19 | 3.059  | Fe3                                                                                                                                                     | 3.070 |
| Fe4                                                                                                          | 3.043 | Fe20 | 3.100  | Fe4                                                                                                                                                     | 3.106 |
| Fe5                                                                                                          | 2.864 | Fe21 | 2.846  | Fe5                                                                                                                                                     | 2.870 |
| Fe6                                                                                                          | 2.816 | Fe22 | 2.834  | Fe6                                                                                                                                                     | 2.886 |
| Fe7                                                                                                          | 3.074 | Fe23 | 3.100  | Fe7                                                                                                                                                     | 3.118 |
| Fe8                                                                                                          | 2.862 | Fe24 | 2.847  | Fe8                                                                                                                                                     | 3.072 |
| Fe9                                                                                                          | 3.091 | Fe25 | 3.058  | Fe9                                                                                                                                                     | 3.105 |
| Fe10                                                                                                         | 3.079 | Fe26 | 3.070  | Fe10                                                                                                                                                    | 2.885 |
| Fe11                                                                                                         | 3.055 | Fe27 | 3.042  | Fe11                                                                                                                                                    | 3.085 |
| Fe12                                                                                                         | 3.072 | Fe28 | 3.066  | Fe12                                                                                                                                                    | 3.083 |
| Fe13                                                                                                         | 2.844 | Fe29 | 2.845  | Fe13                                                                                                                                                    | 2.867 |
| Fe14                                                                                                         | 3.047 | Fe30 | 3.042  | Fe14                                                                                                                                                    | 3.070 |
| Fe15                                                                                                         | 3.045 | Fe31 | 3.054  | Fe15                                                                                                                                                    | 3.090 |
| Fe16                                                                                                         | 3.049 | Fe32 | 3.056  | Fe16                                                                                                                                                    | 3.069 |

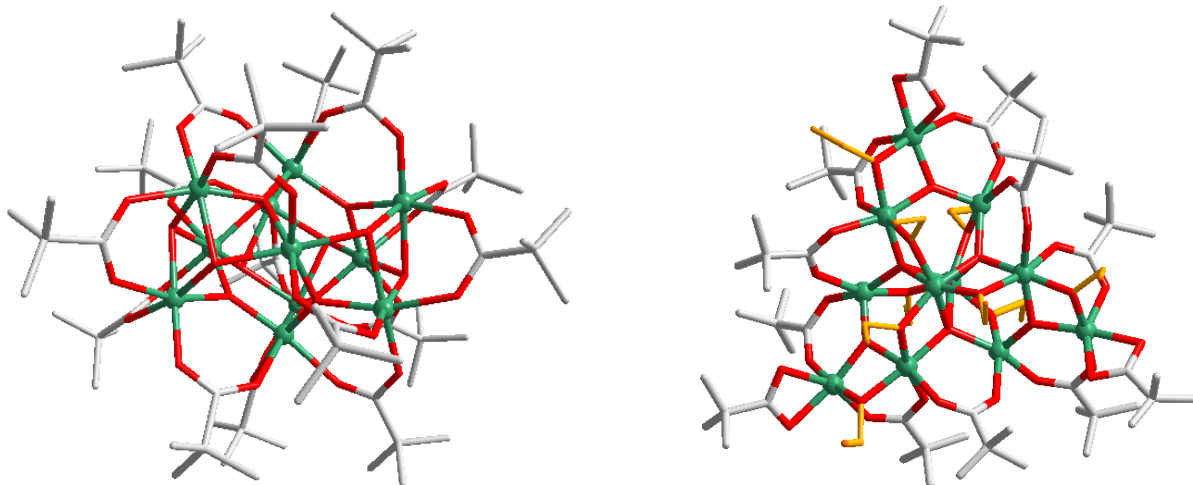

**Figure S1.** Structures of the  $\text{Fe}_{11}$  metallic core in **1** (left) and **2**· $1.5\text{CH}_2\text{Cl}_2$ · $\text{MeCN}$  (right). Hydrogen atoms and solvent molecules are omitted for clarity. Color scheme: Fe, dark green spheres; C, grey sticks; O, red sticks; C atoms of the coordinated ethanol molecules are shown as yellow sticks.

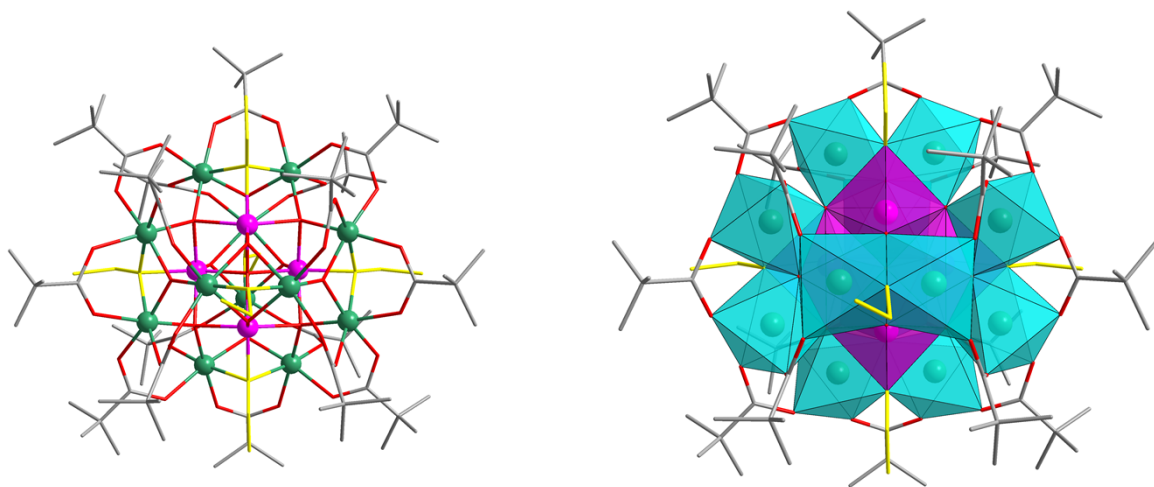

**Figure S2.** A ball-and-stick (left) and polyhedral (right) representation of the  $\text{Fe}_{16}$  metallic core in **3**. Hydrogen atoms and solvent molecules are omitted for clarity. Color scheme: hexa-coordinated Fe, dark green spheres or light blue polyhedra; penta-coordinated Fe, pink spheres or pink polyhedra; C, grey sticks; O, red sticks; ethanol molecules are shown as yellow sticks.

The metallic Fe<sub>16</sub> core in **3** can be also described as an array of five [Fe<sub>4</sub>-(μ<sub>4</sub>-O)] tetrahedra, with the central tetrahedron [defined by Fe5, Fe6, F10, and Fe13 atoms as shown in Fig. S3a] surrounding by other four edge-sharing tetrahedral units. The peripheral Fe atoms of the tetrahedra are further connected to each other through pivalate or μ<sub>3</sub>-ethoxo groups (Fig. S3b). Two iron atoms [Fe1 and Fe2] from one side and other two Fe atoms [Fe15 and Fe16] from other side attached to this conglomerate by four μ<sub>3</sub>-O atoms with the formation of eight [Fe<sub>3</sub>-(μ<sub>3</sub>-O)] triangular units (Fig. S3c). Four of these units (two on each side) are essentially scalene with two longer Fe...Fe separations of 3.388(1) – 3.423(1) Å and one short being 3.081(1) – 3.093(1) Å, and their central μ<sub>3</sub>-O atoms [O3, O4, O9 and O10] lying almost in their Fe<sub>3</sub> plane [0.112, 0.150, 0.162 and 0.113 Å, respectively]. Each pair of Fe atoms within triangle units is additionally bridged by a carboxylate (Fig. S3d). In other four [Fe<sub>3</sub>-(μ<sub>3</sub>-O)] triangular units Fe atoms are also form a scalene triangle with one short edge [Fe1...Fe2, 2.719(1) and Fe15...Fe16, 2.713(1) Å, the short separation corresponds to the one additionally linked by a μ<sub>2</sub>-ethoxo ligand] and two longer ones being in the range of 3.345(1) – 3.412(1) Å, but their μ<sub>3</sub>-O atoms [O1, O2, O11 and O12] distinctly out of their Fe<sub>3</sub> plane [0.627, 0.626, 0.629 and 0.630 Å, respectively].

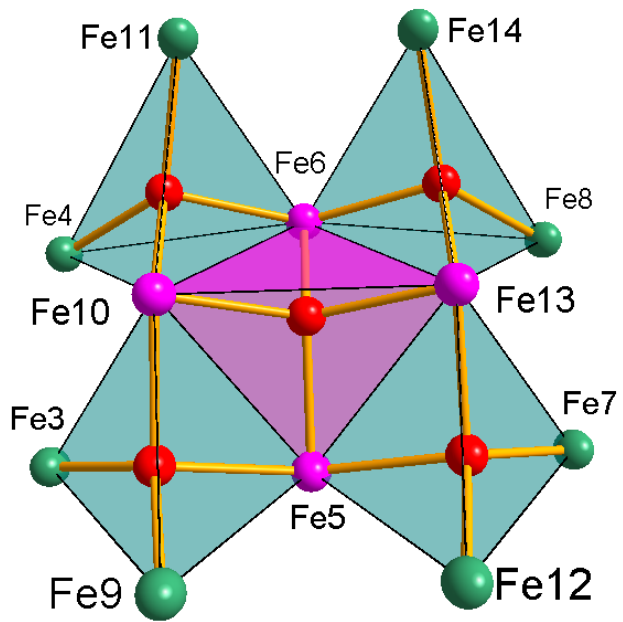

**a**

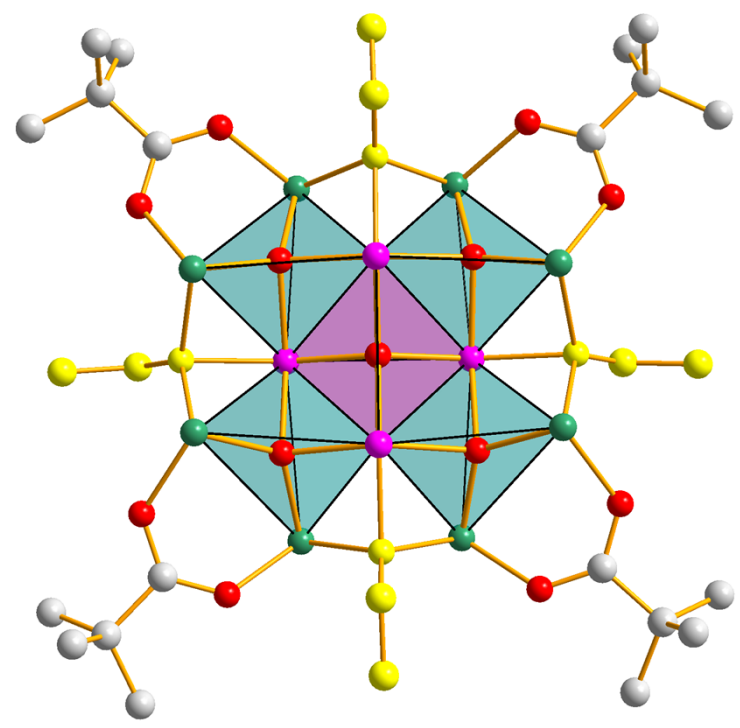

**b**

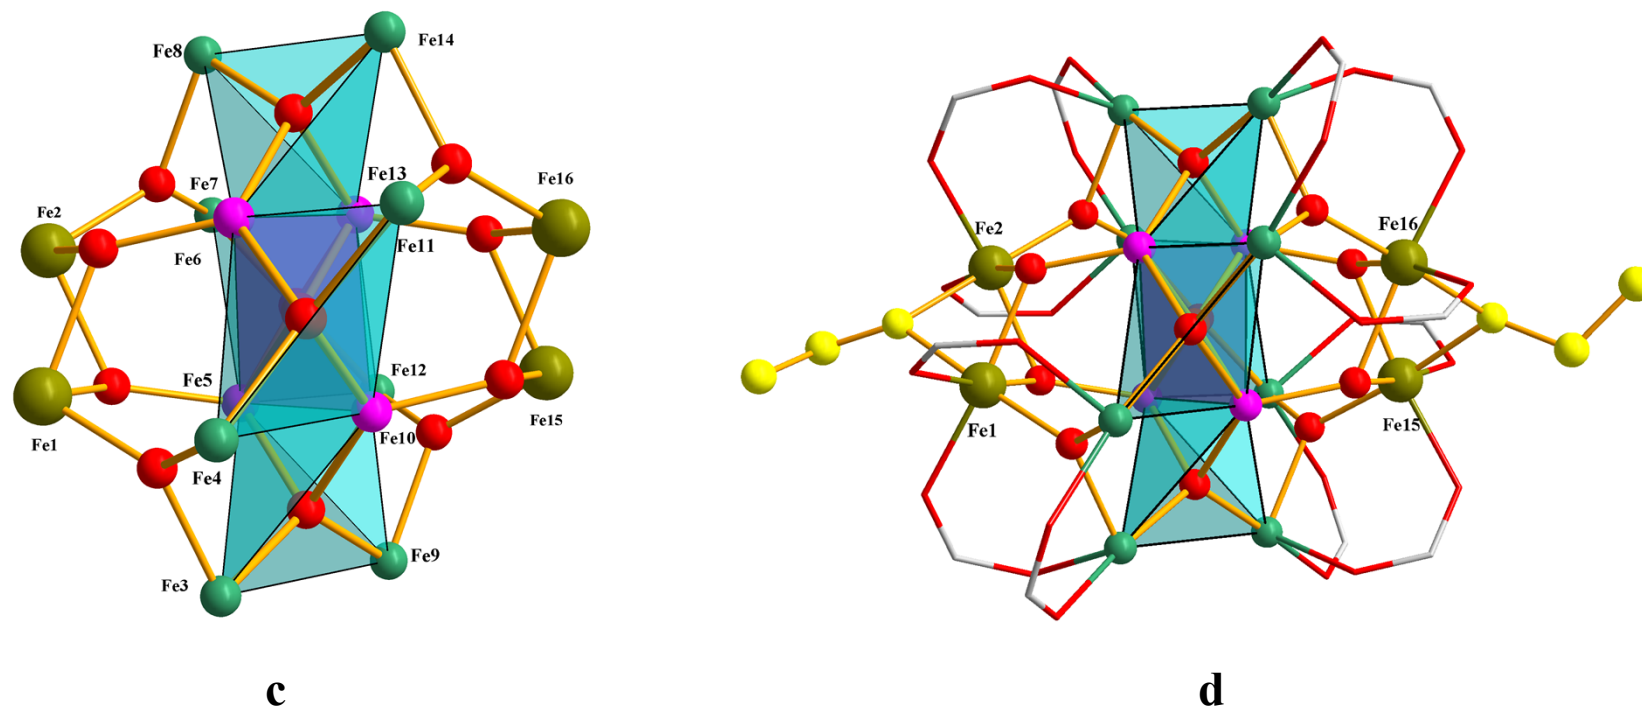

**Figure S3.** Arrangement of the 16 Fe atoms in **3**: (a) an array of five  $[\text{Fe}_4-(\mu_4\text{-O})]$  tetrahedral units in **3**; (b) view showing 12 Fe atoms forming the tetrahedral units with coordinated pivalate and  $\mu_3$ -ethoxo ligands colored in yellow; (c) view showing all 16 Fe atoms in the metallic core of **3** emphasizing the attachment of four Fe atoms (in light green) to the array of tetrahedral units with (d) 12 bridging pivalates (sticks) in four  $[\text{Fe}_3-(\mu_3\text{-O})]$  triangular units and  $\mu_2$ -ethoxo groups colored in yellow.

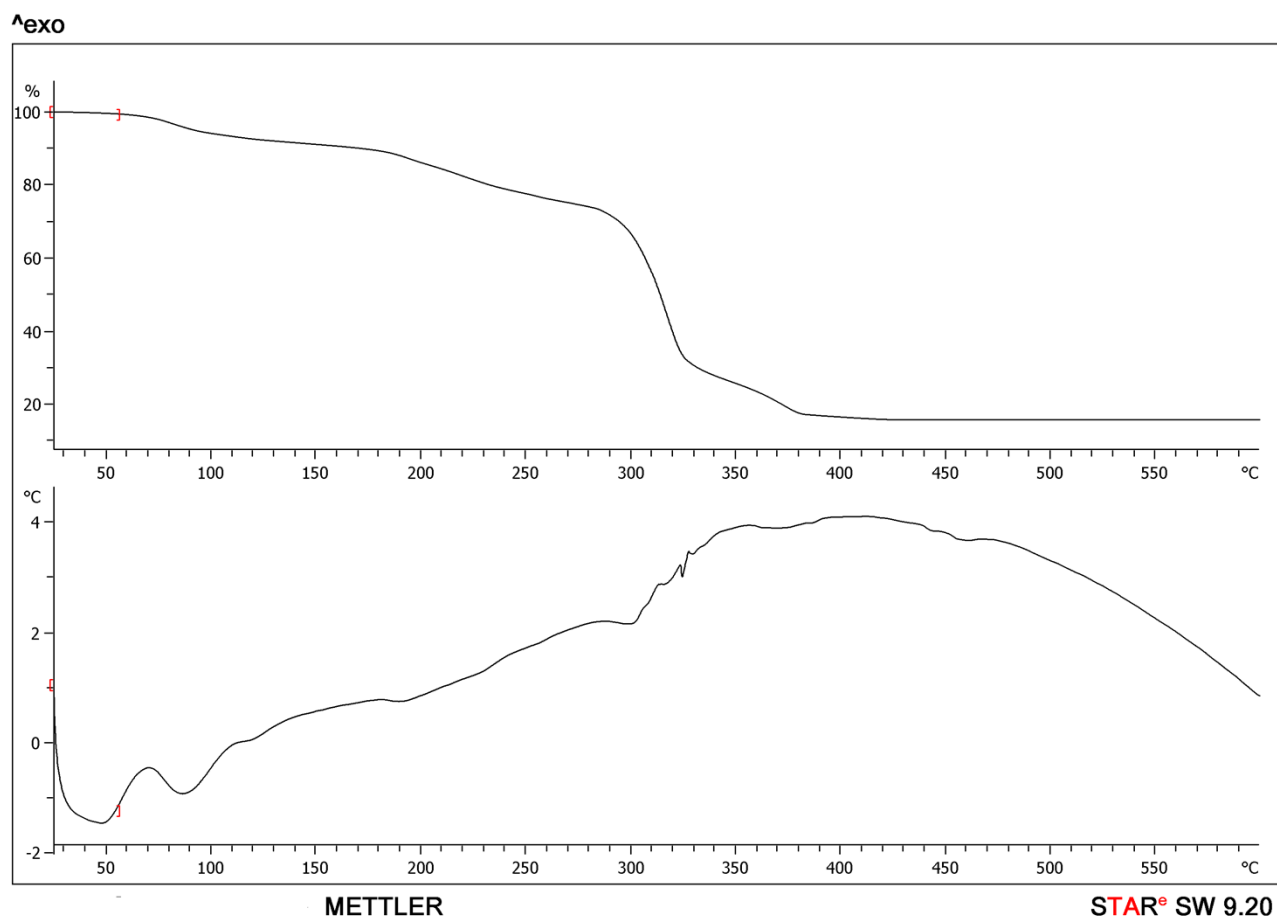

**Figure S4.** TGA/DTA graphs for  $[\text{Fe}_3\text{O}(\text{O}_2\text{CCMe}_3)_6(\text{EtOH})_3]\text{NO}_3 \cdot \text{EtOH}$ .

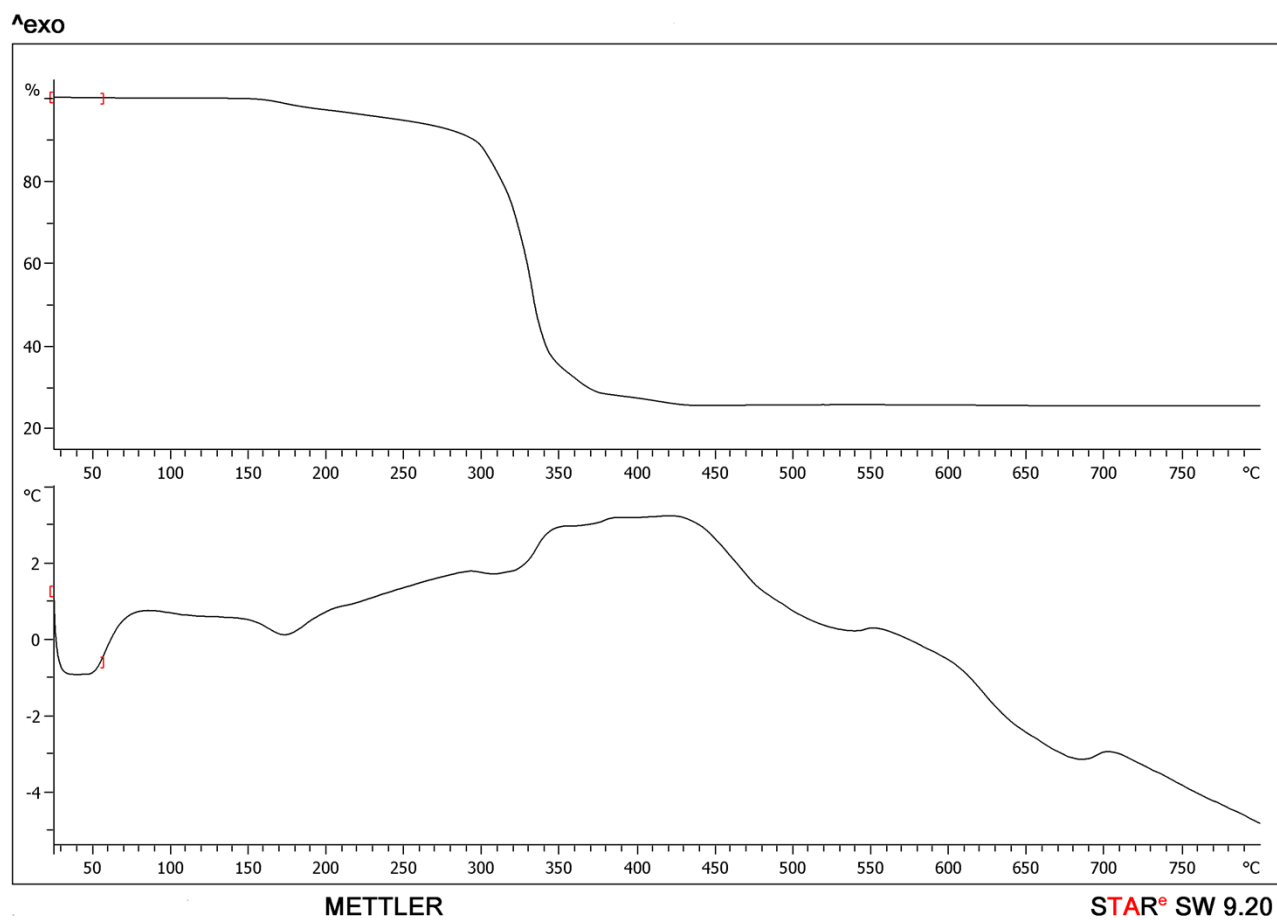

**Figure S5.** TGA/DTA graphs for  $[\text{Fe}_{11}\text{O}_6(\text{OH})_6(\text{O}_2\text{CCMe}_3)_{15}]$  (**1**).



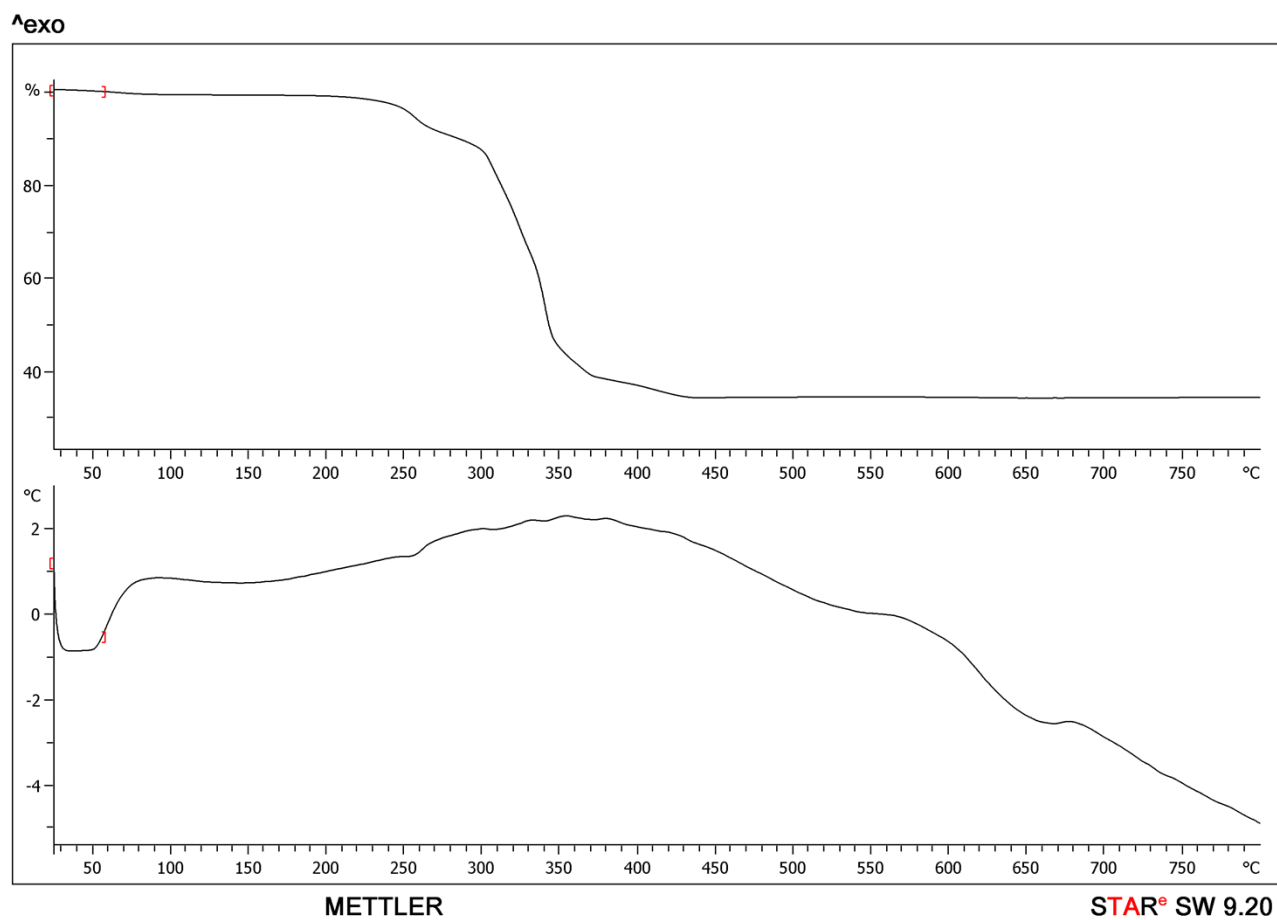

**Figure S6.** TGA/DTA graphs for  $[\text{Fe}_{11}\text{O}_6(\text{EtO})_9(\text{O}_2\text{CCMe}_3)_{12}] (2 \cdot 1.5\text{CH}_2\text{Cl}_2 \cdot \text{MeCN})$ .

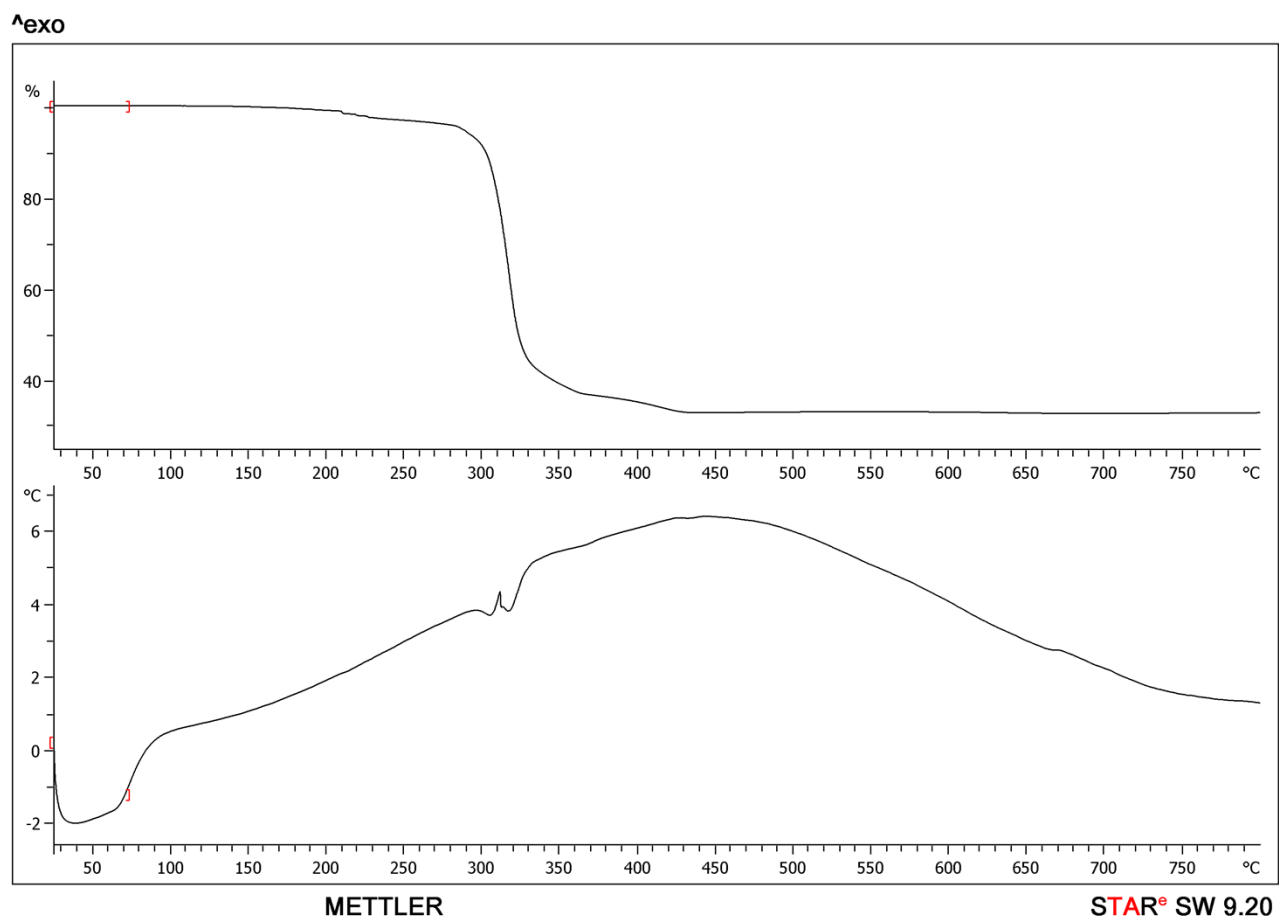

**Figure S7.** TGA/DTA graphs for  $[\text{Fe}_{16}\text{O}_{13}(\text{EtO})_6(\text{O}_2\text{CCMe}_3)_{16}]$  (**3**) [**3·0.25thf**].

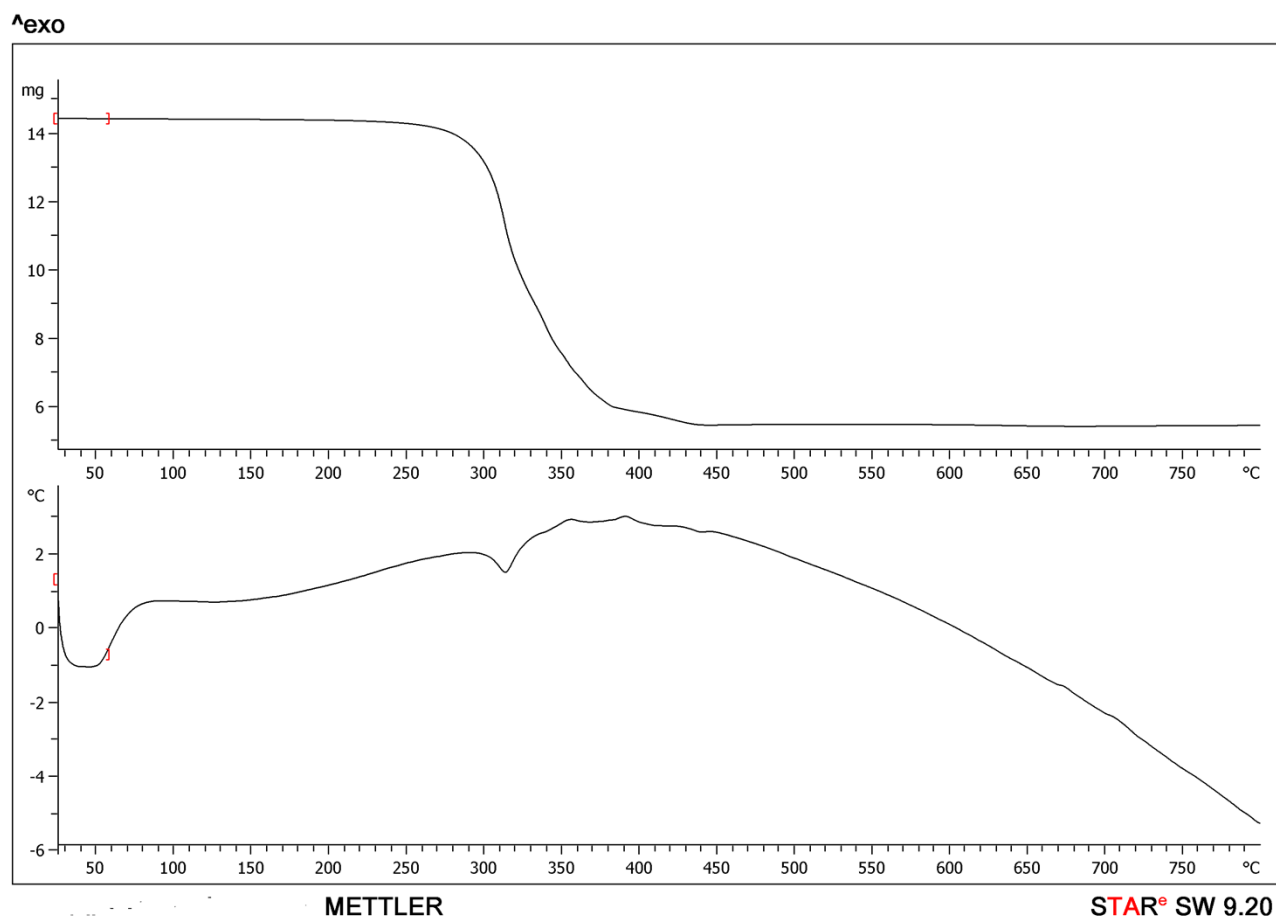

**Figure S8.** TGA/DTA graphs for  $[\text{Fe}_{16}\text{O}_{13}(\text{EtO})_6(\text{O}_2\text{CCMe}_3)_{16}] \cdot (3) [\mathbf{3} \cdot \mathbf{3thf}]$ .
